1 Frequent origins of traumatic insemination  
2 involve convergent shifts in sperm and  
3 genital morphology  
4

5 Jeremias N. Brand<sup>1\*</sup>, Luke J. Harmon<sup>2</sup> and Lukas Schärer<sup>1</sup>

6  
7 <sup>1</sup> University of Basel, Department of Environmental Sciences, Zoological Institute, Vesalgasse 1,  
8 4051 Basel, Switzerland

9 <sup>2</sup> Department of Biological Sciences, University of Idaho, Moscow, USA  
10

11 Short title:

12 Frequent origins of traumatic insemination  
13

14 \*Corresponding Author

15 University of Basel,

16 Department of Environmental Sciences, Zoological Institute,

17 Vesalgasse 1, 4051 Basel, Switzerland  
18

19 Max Planck Institute for Biophysical Chemistry

20 Department of Tissue Dynamics and Regeneration

21 Am Fassberg 11, 37077 Göttingen, Germany

22 Email: [jeremias.br@gmail.com](mailto:jeremias.br@gmail.com)  
23

## 24 Abbreviations

25 HI: Hypodermic insemination

26 PC: principal component

27 pPCA: phylogenetically corrected principal component analysis

28

## 29 Abstract

30 Traumatic insemination is a mating behaviour during which the (sperm) donor uses a traumatic  
31 intromittent organ to inject an ejaculate through the epidermis of the (sperm) recipient, thereby  
32 frequently circumventing the female genitalia. Traumatic insemination occurs widely across animals,  
33 but the frequency of its evolution, the intermediate stages via which it originates, and the  
34 morphological changes that such shifts involve remain poorly understood. Based on observations in  
35 145 species of the free-living flatworm genus *Macrostomum*, we identify at least nine independent  
36 evolutionary origins of traumatic insemination from reciprocal copulation, but no clear indication of  
37 reversals. These origins involve convergent shifts in multivariate morphospace of male and female  
38 reproductive traits, suggesting that traumatic insemination has a canalising effect on morphology.  
39 Signatures of male-female coevolution across the genus indicate that sexual selection and sexual  
40 conflict drive the evolution of traumatic insemination, because it allows donors to bypass  
41 postcopulatory control mechanisms of recipients.

42

43 Keywords: traumatic mating, hypodermic insemination, copulatory wounding, phylogenetics,  
44 evolution, female genitalia, correlated evolution, parallel evolution, sexually antagonistic coevolution

45

46

## 47 Introduction

48 The sexes frequently show differences in mating propensity because male fertility (i.e. fertilised egg  
49 production) is often limited by the number of matings a male achieves, while female fertility is often  
50 limited by the amount of resources a female invests into eggs and offspring [1–3]. The resulting  
51 conflict over mating rate has far-reaching consequences, often resulting in “Darwinian sex roles” with  
52 choosy females and eager males [4]. Females may benefit from choice by selecting males based on  
53 genetic compatibility, genetic quality [5] and/or direct benefits (e.g. nuptial gifts [6]). Indeed,  
54 evidence for female choice is widespread and there are many species where females mate multiply,  
55 suggesting polyandry may indeed result in such benefits [7]. However, females may also mate  
56 multiply as a result of male harassment, and while that could be costly to females, resisting male  
57 harassment might be even costlier [7, 8]. Costly harassment is expected to arise frequently, since  
58 female choice necessarily goes against the rejected males’ interests [9], potentially leading to sexually  
59 antagonistic coevolution between male persistence and female resistance traits [8, 10, 11].

60 In polyandrous species, sexual selection and sexual conflict continue after copulation through  
61 intricate interactions of the female genital tract with the male intromittent organs and the received  
62 ejaculate [12–14]. Female genitalia might exert postcopulatory control through differential sperm  
63 storage, sperm ejection or sperm digestion, thus applying selective filters on male genital and  
64 ejaculate traits. In analogy to the precopulatory conflict, it is then possible for traits in males to arise  
65 that attempt to bypass or influence the female-choice and resistance mechanisms, again resulting in  
66 sexually antagonistic coevolution [12–14].

67 Such coevolution can drive the emergence of male traits that inflict considerable harm on females  
68 [11, 15, 16]. A striking example that implicates such harm is traumatic insemination, which occurs  
69 in some internally fertilising species and involves the infliction of a wound to the female’s integument  
70 through which the male then transfers its ejaculate [17]. Since traumatic insemination occurs in both  
71 gonochoristic (separate-sexed) and hermaphroditic species [17], we in the following use the more  
72 general terms (sperm) donor and (sperm) recipient to refer to the two sexual roles, with no loss of  
73 generality [18].

74 Although traumatic insemination often results in costs to recipients [15, 17, 19–22], it has evolved  
75 repeatedly across animals [17]. And while natural selection might play a role in some taxa—  
76 especially the endoparasitic Strepsiptera [23, 24]—it likely often evolves due to sexual selection and  
77 sexual conflict. Specifically, traumatic insemination can enable donors to enforce copulation and thus  
78 minimise the control that the recipient could otherwise exert over mating [15]. And it may also allow

79 the donor to bypass the recipient's genitalia, by depositing sperm either closer to the site of  
80 fertilisation [24, 25] or even directly within the relevant tissue [15, 26], thus likely reducing the  
81 recipient's ability to control the fate of the received ejaculate [12, 17]. In this view, traumatic  
82 insemination allows the donor to bypass the influence of the recipient's sexually antagonistic choice  
83 and resistance mechanisms, temporarily gaining an advantage in the coevolutionary chase.

84 However, since conflicts persist under traumatic insemination, we expect selection to then act on  
85 traits that allow the recipient to regain control over mating and/or the fate of the received ejaculate.  
86 For example, some species of bed bugs have evolved what is considered a secondary vagina, a  
87 structure shown to reduce the costs incurred due to traumatic insemination [19, 27]. But even without  
88 the emergence of new organs, recipients could evolve behavioural or physiological responses to avoid  
89 traumatic insemination (such as parrying strikes during penis fencing in polyclad flatworms [28]) or  
90 to manipulate and control the hypodermically received ejaculate (e.g. similar to sperm digestion in  
91 copulating species [29–31]).

92 Besides bypassing recipient choice and resistance mechanisms, traumatic insemination could also  
93 evolve due to sperm competition, since in many internally fertilising species sperm of unrelated  
94 donors compete within the female genital tract for fertilisation of the recipient's eggs [32]. In this  
95 context, traumatic insemination might allow donors to avoid sperm competition and prevent  
96 competing donors from removing their previously donated sperm, resulting in paternity benefits [17].  
97 Indeed, traumatic insemination seems to affect sperm competition in a family of spiders, where sperm  
98 precedence is biased towards the first male in a species with traumatic insemination, while it is biased  
99 towards the second male in its non-traumatically mating relatives [17, 23, 33]. In contrast, traumatic  
100 insemination is associated with last male precedence in one species of bed bug [26], so its effects on  
101 sperm competition might depend on a species' morphology and ecology.

102 Traumatic insemination might evolve more frequently in hermaphrodites due to sexual conflict over  
103 the mating roles [12, 18, 34–36]. In general, and analogous to the situation outlined for gonochorists  
104 [1], a hermaphrodite already carrying enough received sperm to fertilise its own eggs might gain little  
105 from additional matings as a recipient, while it could still gain additional fertilisations by acting as a  
106 donor [12]. It is thus likely that, on average, individual hermaphrodites show a preference for sperm  
107 donation [12, 18, 34–36] and this rationale is supported by several laboratory studies [35, 37, 38].  
108 Traumatic insemination then potentially allows individuals to attempt unilateral enforcement of  
109 donation while avoiding receipt. Additionally, hermaphrodites may engage in harmful matings more  
110 readily, because any fitness costs an individual incurs as a recipient may be partially compensated by  
111 fitness benefits it incurs as a donor [34, 39]. Indeed, 11 out of 23 well-supported independent origins

112 of traumatic insemination occurred in hermaphrodites [17], even though hermaphrodites amount to  
113 only ~6% of animals [40]. Hermaphrodites are thus ideal study organisms for investigations of  
114 traumatic insemination, since—while it has been studied in some charismatic systems [15, 25, 28,  
115 41–44]—we currently still know little about the frequency and consequences of its evolution [17, 20,  
116 22].

117 Here we present comparative work on the evolution of traumatic insemination across the genus  
118 *Macrostomum*, a species-rich taxon of hermaphroditic free-living flatworms. In *Macrostomum*,  
119 traumatic insemination is called hypodermic insemination (HI), since in several species the donor  
120 uses a needle-like stylet (Figure 1) to inject sperm through the mating partner's epidermis and sperm  
121 then move through the recipient's body to the site of fertilisation [45–47]. Injected sperm can often  
122 be observed inside the parenchymal tissues of these highly transparent animals [45–48], making it  
123 feasible to screen a large number of species for convergent evolution of HI. And while we here present  
124 evidence that not all traumatically mating *Macrostomum* species may inject sperm through the  
125 external epidermis, we nevertheless use the term HI for consistency with previous literature.

126 The genus comprises two phylogenetically well-separated clades [49], a “hypodermic clade” thought  
127 to exclusively mate through HI and a “reciprocal clade” primarily mating reciprocally (called Clade  
128 1 and 2, respectively, in [45]), with the latter containing a convergent origin of HI in *M. hystrix* [45].  
129 During reciprocal copulation two worms insert their—often relatively blunt—stylet (Figure 1) via  
130 their partner's female genital opening into the female sperm storage organ, the female antrum (further  
131 called antrum), so that both can donate and receive sperm in the same mating [50]. Many reciprocally  
132 copulating species perform a postcopulatory suck behaviour, where worms place their mouth over  
133 their own female genital opening and suck, presumably in an attempt to remove components of the  
134 received ejaculate from their antrum [45, 50–53]. This ejaculate removal could target manipulative  
135 seminal fluids, since the ejaculate of the model species *M. lignano*, contains substances affecting the  
136 mating partner's propensity to perform the suck behaviour [54, 55]. Alternatively, the suck behaviour  
137 could also reduce the number of stored sperm (e.g. to lower the risk of polyspermy), constitute a form  
138 of cryptic female choice (e.g. to favour donors of higher quality), and/or represent a resistance trait  
139 in sexual conflict over mating roles (i.e. to undo unwanted sperm receipt) [45, 51].

140 If the suck behaviour is a recipient resistance trait, we might expect the evolution of donor persistence  
141 traits, potentially leading to antagonistic coevolution [8]. Indeed, the sperm of reciprocally copulating  
142 species generally have a thin anterior feeler and two stiff lateral bristles that could represent such  
143 persistence traits (Figure 1), serving to anchor the sperm in the antrum to prevent removal during the  
144 suck behaviour [45, 51]. In contrast, sperm of species with HI (i.e. the hypodermic clade and

145 *M. hystrix*) lack these bristles and have a simplified morphology, presumably because they no longer  
146 need to resist the suck behaviour [45, 51], which has so far never been observed in species with HI.  
147 These sperm may instead be adapted to efficiently move through the partner's tissues (Figure 1), and  
148 one such adaptation could hypothetically also include a reduced sperm size [45]. Moreover, while  
149 species with reciprocal copulation have an antrum with a thickened epithelium, those with HI have a  
150 simple antrum, presumably because it no longer interacts with the donor's stylet and sperm, and  
151 instead is used for egg-laying only [45]. Based on these findings, the observed adaptations to  
152 reciprocal copulation and HI have been described as the reciprocal and hypodermic mating syndrome,  
153 respectively, since they each constitute specific combinations of morphological (sperm, stylet and  
154 antrum) and behavioural traits [45].

155 If HI indeed represents a resolution of sexual conflict over mating roles, then we would expect it to  
156 evolve frequently. But it is currently unclear whether HI has convergently arisen more than once  
157 within the reciprocal clade. It is also unclear if such transitions are reversible or if the emergence of  
158 HI alters the coevolutionary dynamics between donor and recipient, so that species cannot readily  
159 revert to reciprocal copulation. Here we collate morphological information on 145 *Macrostomum*  
160 species to identify additional independent origins of HI and to quantitatively assess convergent  
161 changes in both sperm design, and in male and female genital morphology that accompany its  
162 evolution, taking advantage of a recent large-scale phylogenomic analysis of the genus [49]. Using  
163 ancestral state reconstruction, we further ask whether species can revert to reciprocal copulation once  
164 HI has arisen. Moreover, if sexually antagonistic coevolution drives the emergence of HI, we expect  
165 signatures of coevolution. We thus test for covariation between male and female genital traits and  
166 survey the genus for novel resistance and persistence traits.

## 167 Results

### 168 Species collected and phylogenetics

169 We used phylogenetic information and operational species assignments that we recently generated by  
170 integrating morphological and transcriptome data, supplemented with partial *28S rRNA* sequences  
171 and information from the literature [49]. We used a phylogeny including 145 species (C-IQ-TREE,  
172 shown in Figure 2), but to assess how sensitive our analyses are to phylogenetic uncertainty, we also  
173 performed all analyses on two alternative phylogenies, including only 98 species with full  
174 transcriptome information (H-IQ-TREE and H-ExaBayes). Since all results were quantitatively  
175 similar and qualitatively identical, we focus on the C-IQ-TREE results, but report the additional  
176 analyses in the supplementary files. We collected morphological data on up to eight quantitative traits  
177 from 1442 specimens and scored eleven categorical traits on a per-species basis (see Materials and  
178 Methods, and SI Morphology for details; see Table S1 for sample sizes, Table S2 for all  
179 measurements, and Table S3 for species mean values).

### 180 Frequent origins of hypodermic insemination

181 We inferred the number of convergent transitions to HI using ancestral state reconstruction (ASR) of  
182 several reproductive traits (Figure 2). Because scoring the received sperm location involves  
183 observation of sperm within the recipient's tissue, it provides the most direct evidence for HI (Table  
184 1 and SI Morphology). However, observation of injected sperm in field-collected specimens can be  
185 challenging, especially in species with low investment into sperm production, thus reducing sample  
186 size. Since tests of correlated evolution revealed strong associations of hypodermic sperm with  
187 absent/reduced sperm bristles and a thin antrum (see the next section), we therefore also performed  
188 ASR using the sperm bristle state and antrum state as proxies for HI. Finally, we also performed ASR  
189 on the inferred mating syndrome, which represents a synthesis of all available information (Table 2  
190 and Materials and Methods). We performed ASR, with all traits scored as binary and, where  
191 appropriate, also as trinary, to test if HI could evolve via an intermediate state (see Materials and  
192 Methods).

193 All reconstructions indicated frequent origins of HI (Table 1 and Figure S1). In all analyses with  
194 trinary states, an ordered transition model without gains once traits have been lost (ORD-Dollo) was  
195 preferred, and in all analyses with binary states, a model without gains (Dollo) was preferred.  
196 However, other models, including some permitting gains, also received at least some support (Table



197 1). ASR of trinary states inferred frequent transitions to the intermediate state, which were driven by  
198 the ordered model's requirements to transition through it. These transitions were often placed along  
199 internal branches of the phylogeny, primarily within the clade containing *M. finlandense* (Figure 2B,  
200 middle), which contains several species with reduced or absent states and, nested within them, two  
201 species with present states (*M. sp. 12* and *M. sp. 44*, with received sperm in the antrum, long bristles,  
202 and assigned to the reciprocal mating syndrome; Figure S1 A, C, F). To represent this diversity,  
203 Figure S2 combines our Figure 2 with drawings of stylet and sperm morphology available from [49].  
204 We estimated a lower bound for the number of transitions by requiring an origin of the derived state  
205 to be separated by other such origins via nodes with a >95% posterior probability of having the  
206 ancestral state. Applying this rule to traits scored as binary, we find nine transitions to hypodermic  
207 received sperm, 17 losses/reductions of sperm bristles, 13 simplifications of the antrum, and 13  
208 transitions to the hypodermic or intermediate mating syndrome (see red stars and numbers in Figure  
209 S1). Moreover, these lower-bound estimates were slightly lower for trinary states. Finally, we found  
210 qualitatively very similar results on the other two phylogenies included, albeit, since they contain  
211 fewer species, showing somewhat lower numbers of transitions (Table S4).

## 212 Correlated evolution

213 We performed tests of correlated evolution to ask if the numerous convergent changes in received  
214 sperm location, sperm bristle state and antrum state are evolutionarily dependent. We found strong  
215 support for correlated evolution of received sperm location with both sperm bristle state and antrum  
216 state (Figure 3A+B). This supports previous findings that HI is associated with changes in sperm  
217 design and antrum simplification [45]. Therefore, when observations of received sperm are missing,  
218 both sperm bristle state and antrum state are likely good proxies for the mating syndrome. We expand  
219 on the earlier analyses by also providing evidence for the correlated evolution between the sperm  
220 bristle state and antrum state (Figure 3C), which was implied in [45], but not formally tested. Across  
221 the board, we find substantially stronger support for correlated evolution than [45], with Bayes factors  
222 that are ~7-fold larger, reflecting the larger sample sizes and the larger number of transitions.  
223 Moreover, these analyses were robust with respect to the phylogeny and the priors used (see SI  
224 Correlated evolution).

## 225 Convergence in morphospace

226 Next, we used phylogenetically corrected principal component analysis (pPCA) to investigate if these  
227 convergent transitions to HI also coincided with changes in a larger set of reproductive traits (see SI

228 Morphology). The first two principal components, PC1 and PC2, captured nearly half of the variation  
229 in the reproductive traits (Figure 4A), followed by additional principal components with relatively  
230 small contributions (Table S5). Specifically, PC1 captured a change in stylet phenotype, with larger  
231 values indicating species with longer, more curved stylets, that are distally more symmetric and less  
232 sharp (Figure 4A). Larger values of PC1 also indicated both longer sperm and bristles, and an  
233 increased probability for the sperm to carry a brush. Finally, high values of PC1 indicated a thickened  
234 antrum with a more pronounced cellular valve, and a more complex internal structure. In comparison,  
235 PC2 had a less clear interpretation, with high values indicating larger species with larger proximal  
236 and distal stylet openings.

237 Species in the hypodermic clade (stippled outlines) had similar values in PC1 and mainly differed in  
238 PC2 (Figure 4A). Interestingly, species from the reciprocal clade (solid outlines) that we had assigned  
239 to the hypodermic mating syndrome (left yellow) grouped closely with the species in the hypodermic  
240 clade, indicating striking convergence in morphospace concerning stylet, sperm and antrum  
241 morphology (Figure 4C and Figure S3). PC1 further separated species based on the received sperm  
242 location, with hypodermic received sperm (right yellow) only found in species with low PC1,  
243 indicating that low PC1 captures a morphology necessary for HI. Almost all species with reduced  
244 (triangles) or absent (circles) sperm bristles grouped closely together in PC1, with the notable  
245 exception of *M. sp. 68* and *M. sp. 82* (black arrowheads), which cluster together with other species  
246 that we assigned to the reciprocal mating syndrome. We observed sperm in the antrum of both species  
247 (i.e. in 2 of 7 specimens in *M. sp. 68* and 16 of 21 specimens in *M. sp. 82*) and the antrum is similar  
248 in both, with a long muscular duct that performs a 90° turn towards the anterior before it enters a  
249 second chamber that is strongly muscular (Figure S4). Moreover, both species have a similar L-  
250 shaped stylet with a blunt tip, which makes it unlikely that they mate through HI.

## 251 Hypodermic insemination and sperm length

252 In addition to the changes in sperm design mentioned above, we tested whether HI is associated with  
253 a change in sperm length using phylogenetic least squares (PGLS) regression. We used received  
254 sperm location, sperm bristle state, antrum state, and the inferred mating syndrome as predictors and  
255 the log<sub>10</sub>-transformed sperm length as the response variable. In all cases, the states that indicate the  
256 reciprocal mating syndrome were associated with longer sperm, with the largest effect for the antrum  
257 state, followed by the inferred mating syndrome (Figure 4B and Figure S5). This is reasonable, since  
258 the bristle type falsely classified *M. sp. 68* and *M. sp. 82* as hypodermically mating, while the  
259 received sperm location and inferred mating syndrome analyses had slightly lower samples sizes. The

260 predictive value of these PGLS models was generally high, indicating that a large proportion of the  
261 variation in sperm length is explained by the phylogeny and these mating syndrome indicators of the  
262 (Table S6). Note that despite these strong associations, there is considerable overlap in sperm length  
263 between the species exhibiting the different states, with some species with the reciprocal mating  
264 syndrome having short sperm (Figure 4B, Table S3) and an overall 6.7-fold variation in sperm length  
265 across all species (with means ranging from 25.6 to 173.1  $\mu\text{m}$ ).

## 266 Male-female coevolution

267 To investigate coevolution between male and female genital traits, we independently summarised five  
268 male and four female genital traits using pPCA. Stylet PC1 was positively loaded with stylet length  
269 and the width of the distal opening, and it was negatively loaded with distal asymmetry (Figure 5A;  
270 Table S7). Therefore, high values of Stylet PC1 represent a more elongate stylet with a wider and less  
271 sharp distal opening. Antrum PC1 was positively loaded with all input variables (Figure 5B), meaning  
272 that large values represent more complex female genitalia. A PGLS regression of Stylet PC1 on  
273 Antrum PC1 across all species revealed a significant positive relationship (Figure 5C). This  
274 relationship closely matches the loadings on PC1 in the pPCA analysis of all reproductive traits  
275 (Figure 4A) and could be driven by the simple antra in hypodermically mating species. Therefore, we  
276 restricted the analysis to include only species assigned to the reciprocal mating syndrome and could  
277 confirm the positive relationship between Stylet PC1 and Antrum PC1 (Figure 5C).

## 278 Discussion

279 Across the genus *Macrostomum*, hypodermic insemination (HI) has evolved independently at least 9  
280 times as assessed by the location of received sperm, and at least 13 times based on the more inclusive  
281 inferred mating syndrome. According to [17], 12 and 11 origins of traumatic insemination have been  
282 found in gonochorists and hermaphrodites, respectively (including the two cases previously  
283 documented in *Macrostomum*). This means that, based on an investigation of a single free-living  
284 flatworm genus, we here approximately double the number of documented origins of HI among  
285 hermaphrodites. Since free-living flatworm diversity remains notoriously understudied [56], and  
286 since most of the collected *Macrostomum* species are likely undescribed [49], it seems probable that  
287 we have not even documented all convergent origins of HI within *Macrostomum*. Moreover, three  
288 additional origins of traumatic insemination occur in the genus' parent group (Macrostomorpha [57]),  
289 suggesting that traumatic insemination may evolve frequently there and potentially also in other  
290 groups of flatworms.

291 Interestingly, we find no clear evidence for reversals back to reciprocal mating once HI has arisen,  
292 since the Dollo models were preferred in all our ancestral state reconstructions (although alternative  
293 models in some cases also received some support, Table 1). Reciprocal copulation is the ancestral  
294 state of the reciprocal clade, but the state of the most recent common ancestor of the genus is less  
295 certain (Figure S1), allowing for either a gain or a loss. Similarly, the clade containing *M. finlandense*  
296 (Figure 2B, middle) could contain either two independent losses or a single loss with a gain in  
297 *M. sp. 12* and *M. sp. 44* (Figure S1). We think the former is more likely since shifts to HI might be  
298 predominantly unidirectional. Specifically, once copulation is lost, a reversal would presumably  
299 require both mating partners to again coordinate reciprocal mating behaviour. Additionally, a  
300 subsequent antrum simplification could further hinder reversals, since copulating species have traits  
301 that presumably reduce the risk of injury (e.g. thickened antrum epithelia and stylets with blunt distal  
302 thickenings). In their absence, occasional reciprocal copulations could result in high fitness costs for  
303 both partners. In contrast, HI is presumably often unilateral, thus not requiring both partners to  
304 cooperate.

305 Our detailed observations of received sperm in both the antrum and embedded inside the recipient's  
306 tissues led us to categorise two species, *M. sp. 3* and *M. sp. 101*, as intermediate between the mating  
307 syndromes (light green triangles in Figure 4). These observations suggest that evolutionary transitions  
308 to HI occur through initial traumatic injection of sperm during canonical reciprocal copulation,  
309 possibly as a result of accidental hypodermic sperm transfer during copulatory wounding (for a more  
310 detailed discussion, including drawings and images on where we observed sperm in these two species,

311 see SI Pathways to hypodermic insemination). Once HI has evolved, recipients in some organisms  
312 evolve secondary female genitalia to avoid costs of wounding and regain control over the received  
313 ejaculate [17]. Why this has not occurred in *Macrostomum* is unclear, but it might imply that costs of  
314 HI are generally low (possibly due to the striking regeneration ability of these flatworms [58]) or that  
315 the location of insemination is too variable for the evolution of a localised novel organ.

316 An earlier study [45] classified a needle-like stylet and shorter, simpler sperm as adaptations for HI,  
317 and observed an associated simplification of the antrum, presumably because it is only used for egg-  
318 laying in hypodermically mating species. Their test of correlated evolution of discrete antrum, stylet  
319 and sperm traits supported this hypothesis [45], but included only two independent origins of HI, with  
320 one containing a single species (*M. hystrix*). While tests of correlated evolution supposedly correct  
321 for phylogenetic dependencies, it was recently outlined that they can support the dependent model of  
322 evolution even with only a single (unreplicated) origin of the trait states in question ([59, 60]). Thus,  
323 while the previous findings supported correlated evolution, that evidence was not as decisive as these  
324 tests may have suggested. By sampling more convergent events, we here remedy this limitation,  
325 substantially raising our confidence in a causal link between sperm bristle and antrum state with HI  
326 (and this convergence has taxonomic implications, as we outline in more detail in SI Taxonomy). The  
327 increased sample size also enabled the pPCA analysis showing that species with HI indeed have  
328 similar values of PC1, with such values corresponding tightly to the mating syndromes described by  
329 [45] (note our slight adjustment of their definitions due to incomplete behavioural observations, Table  
330 2), suggesting they truly are adaptations to HI. The striking convergent evolution clearly suggests that  
331 the origin of HI canalises taxa both morphologically and behaviourally.

332 Besides HI and its associated traits, another example of convergent evolution in *Macrostomum* is the  
333 origin of a second female genital opening, which the phylogeny suggests has evolved at least four  
334 times independently within the genus (for a more detailed discussion see SI Female openings). In all  
335 species, the novel second opening is associated with a muscular bursa that could possibly allow  
336 cryptic female choice by ejecting sperm via muscular contractions. Such contraction occurs during  
337 the suck behaviour in *M. hamatum*, a species with only a single opening, where sperm can be observed  
338 to be partially pushed out from the antrum even before the worm places its mouth on the female  
339 genital opening (P. Singh, pers. comm.).

340 Frequent convergent evolution of potential resistance traits, like a second female genital opening, or  
341 of alternative strategies, like HI, bolsters the interpretation that they resolve sexual conflict over  
342 mating rate, mating role or both [12, 18, 28, 34, 45, 51]. HI likely is an alternative strategy in an  
343 ongoing evolutionary chase between donor and recipient, with donor persistence traits, such as  
344 complex sperm with bristles [45] and manipulative seminal fluids [54, 55], and recipient resistance

345 traits, such as the suck behaviour [50] and complex female genitalia [50, 51], engaged in constant  
346 antagonistic coevolution [12, 17, 20, 34]. We find evidence for such male-female genital coevolution,  
347 both across all species and within the species assigned to the reciprocal mating syndrome (Figure 5).  
348 Our findings agree with other work on hermaphrodites (e.g. [41, 61, 62]) and contribute to a growing  
349 body of evidence that male-female coevolution is common in both hermaphrodites and gonochorists  
350 [63–66]. Genital coevolution is not only expected due to sexual conflict but also predicted in the  
351 context of sexual selection. Under the sexual selection perspective, we expect coevolution due to  
352 cryptic female choice, where the recipient will choose based on genital traits of the donor [67]. Donors  
353 are therefore selected to closely match their genital morphology to the selection criteria of the  
354 recipient. Under both views, the respective selective optima of these traits might differ between  
355 species, driving diversification and speciation [68, 69]. Our findings clearly document a dynamic  
356 evolutionary history of male-female coevolution driving frequent innovations of sexual traits.  
357 Traumatic insemination allows donors to (temporarily) overcome pre- and postcopulatory choice  
358 and/or resistance mechanisms of the recipient, and results in striking convergence in morphospace  
359 (Figure 4).

360 One very striking convergent change we observe is that HI leads to a reduction in sperm size, for  
361 which we see three possible explanations. First, because HI avoids the recipient's genitalia, it  
362 probably reduces the scope for both cryptic female choice by the recipient (e.g. via the suck  
363 behaviour) and sperm displacement/removal by competing donors. These postcopulatory  
364 mechanisms can introduce skews in sperm representation [70–73], which can result in lower levels  
365 of sperm competition compared to a “fair-raffle” type sperm competition when sperm mix more freely  
366 [32, 74, 75]. In this case, HI could increase sperm competition and, if sperm size trades-off with  
367 sperm number [74–76], select for smaller sperm [45, 77]. Second, *Macrostomum* sperm is large  
368 compared to the antrum, and therefore intimately interacts with its epithelium, often being partially  
369 embedded in the cellular valve with the feeler [45, 50, 51, 78], and sperm is also in close contact with  
370 rival sperm when recipients mate multiply [79, 80]. Under such conditions of high sperm density, i.e.  
371 when sperm displacement is likely (e.g. [81–83]), sperm are predicted to be bigger compared to  
372 species in which the sperm storage organ is substantially larger than the sperm [84, 85]. While under  
373 HI sperm still intimately interact with the partner's tissue, the “storage organ” could now include the  
374 recipient's whole body, reducing sperm-sperm interaction and decreasing positive selection on sperm  
375 size. Third, if small sperm can move more efficiently through the dense parenchymal tissue of the  
376 mating partner then natural selection could favour a decrease in sperm size [45]. Little is known about  
377 sperm movement within the recipient's tissues, but it seems analogous to the undulating movement  
378 of the sperm body observed within the antrum [86]. These explanations are not mutually exclusive,

379 and their relative importance might depend on the physiology, morphology, and ecology of each  
380 species.

381 Besides changes in sperm length, we confirm that the evolution of HI involves the convergent  
382 reduction and loss of sperm bristles [45, 49] (Figure SX), and document hypodermic received sperm  
383 in species with reduced bristles, indicating that HI can precede the complete loss of bristles. The  
384 preference for an ordered model in the ASR even suggests that transitions via an intermediate state  
385 may be the rule. It is unclear if bristle loss is adaptive or whether it occurs due to relaxed selection  
386 and subsequent drift and/or pleiotropy [87, 88]. Sperm bristles might result in costs for the donor,  
387 such as a reduced spermatogenesis rate or reduced sperm mobility in the partner's tissue [45]. Indeed,  
388 spermatogenesis of the complex sperm with bristles of *M. lignano* takes longer than the development  
389 of the simpler sperm in *M. pusillum* (6 vs. 4 days [89–91]). However, this could also be because *M.*  
390 *lignano* sperm is longer, as sperm length can be associated with a longer sperm development time  
391 [92, 93]. Since several hypodermically mating species have reduced bristles, their cost in terms of  
392 movement might also be minimal, at least once they are relatively small. We also document species  
393 that very likely copulate reciprocally but do not have sperm bristles, suggesting that HI is not the only  
394 reason for bristle loss/reduction. From our observations, it appears that sperm is deposited deep inside  
395 the complex antrum of these species, so that sperm bristles may no longer be necessary to resist the  
396 suck behaviour (note, however, that this behaviour was not seen in mating observations of *M. sp.* 82  
397 and we currently have no mating observations of *M. sp.* 68, P. Singh, pers. comm.).

398 The sperm of a member of the *M. pusillum* species-complex in the hypodermic clade contains  
399 electron-dense bodies [94], similar to the bristle anchor structures identified in the reciprocally mating  
400 *M. tuba* and *M. lignano* [86, 95]. If these structures are indeed remnants of sperm bristles, this would  
401 support the hypothesis (in agreement with our ASR) that bristles are symplesiomorphic in  
402 *Macrostomum*, with bristle loss as the derived condition. Moreover, sperm bristles have not been  
403 observed in three species of *Psammomacrostomum* (pers. obs.), the sister taxon of *Macrostomum* [57]  
404 (and the outgroup used in our analyses), nor in a presumably closely associated genus (i.e. *Dunwichia*  
405 [96]). Sperm bristles thus appear to be a novel trait that is restricted to the genus *Macrostomum*, but  
406 detailed investigations of sperm ultrastructure across the Macrostromorpha are needed to evaluate this  
407 hypothesis.

408 Even though sperm morphology and sperm design is exceptionally diverse across animals, little is  
409 known about the functional significance of this diversity [97]. Because traumatic insemination  
410 originates frequently, it offers an exciting opportunity to elucidate the relative importance of natural  
411 and sexual selection for the evolution of sperm morphology (e.g. survival during sperm storage vs.

412 rapid and efficient movement through tissue) and contribute to an integrative view of sperm ecology  
413 [98]. To disentangle mechanisms shaping sperm length evolution, we should ideally investigate the  
414 sperm morphology of other groups of organisms that have evolved traumatic insemination and make  
415 use of natural variation in the location of sperm injection and sperm storage. For example, in bedbugs,  
416 the elaboration of the sperm receiving organ varies considerably from just being a slightly thickened  
417 epithelium to a complex spermalege [27, 99]. If movement efficiency is a crucial constraint, we might  
418 expect a negative correlation between sperm length and tissue transit time. Also of interest are  
419 comparative investigations of sperm length in species with traumatic insemination directly into the  
420 recipient's reproductive tract (e.g. the fruit fly *Drosophila parabiplectinata* [43] or the spider  
421 *Harpactea sadistica* [33]), because here movement through tissue is absent and presumably other  
422 factors related to sexual selection dominate.

423 In summary, our work clearly highlights that the genus *Macrostomum* is a promising taxon for the  
424 study of sperm form and function, combining a high morphological diversity with a large number of  
425 evolutionary origins, and additionally offering many desirable laboratory animal characteristics and  
426 an increasing availability of genetic tools [100–102]. *Macrostomum* will also afford more in-depth  
427 investigation of HI and shed light on this intriguing behaviour's origin and function.



## 428 **Materials and Methods**

### 429 **Phylogenetics**

430 We performed all analyses using three recently generated phylogenies [49]. Two of these are based  
431 on 385 protein sequences (94,625 amino acid positions), include 98 species, and were inferred using  
432 maximum-likelihood (H-IQ-TREE) or Bayesian methods (H-ExaBayes). The third phylogeny (C-IQ-  
433 TREE) was also inferred using maximum-likelihood based on the same protein alignment, but  
434 additionally included partial *28S rRNA* sequences, allowing us to include 47 additional species (145  
435 in total) [49].

### 436 **Morphological data**

437 We used morphological data primarily from field-collected specimens, from a global sampling effort,  
438 for which we previously made available detailed image and video material [49]. We obtained both  
439 quantitative (Q) and categorical (C) data from the collected specimens or from the taxonomical  
440 descriptions of a few species we did not collect ourselves. Categorical data were determined on a per  
441 species basis, while quantitative data were taken per individual. We measured body size (Q) as the  
442 total body area and either measured or scored various aspects of the stylet (Q: length, curviness, width  
443 of the proximal opening, width of the distal opening, and asymmetry of the distal thickening; C:  
444 sharpness of the distal thickening), of the sperm (Q: total length, bristle length; C: sperm bristle state,  
445 presence of a brush, and presence of a velum), and of the antrum (Q: number of genital openings; C:  
446 antrum thickness, presence and thickness of anterior cellular valve, antrum chamber complexity, and  
447 an overall compound measure of antrum complexity). See SI Morphology for details on these  
448 measures (and Tables A1-2 and Figures A1-3 therein). Morphometric analyses were performed using  
449 ImageJ ([103], version 1.51w) and the plugin ObjectJ (version 1.04r, available at  
450 <https://sils.fnwi.uva.nl/bcb/objectj/>). The pixel length of structures was converted into  $\mu\text{m}$  using a  
451 stage micrometre. For comparative analysis we transformed body area ( $\log_{10}$  of the square-root) and  
452  $\log_{10}$  transformed all linear measures (stylet length, width of the proximal opening, width of the distal  
453 opening, sperm length, and bristle length).

### 454 **Inferred mating syndrome**

455 The original definition of the mating syndromes integrated morphological and behavioural traits [45],  
456 but because we lacked behavioural data for most species, we adapted these definitions, relying instead

457 on several morphological traits and the observed received sperm location to derive the inferred mating  
458 syndrome (Table 2; see also SI Morphology). We assigned species to the hypodermic mating  
459 syndrome if we exclusively found hypodermic received sperm, since this represents strong evidence  
460 for hypodermic insemination, as opposed to species where we observed both hypodermic sperm and  
461 received sperm in the female antrum, which we classified as intermediate (Table 2). Moreover,  
462 because hypodermic sperm can be difficult to observe, especially in species with low investment into  
463 sperm production, we also assigned species that lacked received sperm observations to the  
464 hypodermic mating syndrome based on their morphology alone, namely when they had a simple  
465 antrum, a sharp stylet, and absent or reduced sperm bristles (Table 2). And while observing received  
466 sperm in the female antrum may not exclude occasional hypodermic insemination, it is a strong  
467 indication of the reciprocal mating syndrome, especially when it occurs in a species with a blunt  
468 stylet. We, therefore, assigned all species with received sperm in the antrum and a blunt stylet to the  
469 reciprocal mating syndrome (Table 2). And since some reciprocally mating species also have a sharp  
470 stylet (e.g. *M. spirale*), which could possibly wound the partner internally during mating (pers. obs.),  
471 we also assigned these species to the reciprocal mating syndrome, provided that we observed received  
472 sperm in the antrum, and that they had sperm with bristles (Table 2). These assignments based on  
473 morphology alone are supported by our analysis of correlated evolution, showing a strong association  
474 between the received sperm location and both sperm bristle state and antrum type, respectively (see  
475 Results). The inferred mating syndrome is therefore a more inclusive classification of hypodermic  
476 insemination compared to an assignment based on received sperm location alone.

## 477 Frequent origins of hypodermic insemination

478 We conducted ancestral state reconstruction (ASR) of the mating syndrome and three proxies  
479 (received sperm location, sperm bristle state, and antrum state). First, we used the binary scorings  
480 (see SI Morphology) used in the tests for correlated evolution (see below). However, since we  
481 predicted that losses/reductions of some traits would transition via an intermediate state, we also  
482 performed ASR of the inferred mating syndrome, received sperm location and sperm bristle state  
483 scored as trinary states. We conducted ASR using stochastic character mapping [104] with the R  
484 package phytools [105]. We determined the appropriate transition matrix for ASR by fitting MK-  
485 models with equal rates (ER) of state transitions, with symmetric rates (SYM), with all rates different  
486 (ARD), and with a model without the possibility of gains once the trait is lost (Dollo). For traits with  
487 trinary states, we additionally fit an ordered model, where transitions are forced through an  
488 intermediate state (ORD) and an ordered model with no gains once the trait is lost, but allowing  
489 reversions from the intermediate state (ORD-Dollo). We conducted ASR for models with a corrected

490 AIC weight  $>0.15$  (Table 1) and used the Bayesian implementation of stochastic character mapping  
491 with a gamma prior throughout ( $\alpha = 1$ ,  $\beta = 1$ , i.e. a low rate of transitions) and reconstructed 1000  
492 histories (10,000 iterations burn-in followed by 10,000 iterations and retaining every 10<sup>th</sup> character  
493 history). We summarised the number of transitions as the average number of changes as well as the  
494 95% credible interval.

## 495 Correlated evolution

496 Since we do not have direct observations of received sperm in all species, we first conducted a  
497 correlation test between sperm bristle state and received sperm location, and then tested for correlated  
498 evolution between both of these variables and the antrum type. We scored all traits as binary and  
499 applied Pagel's correlation test [106] as implemented in BayesTraits3 (available at  
500 <http://www.evolution.rdg.ac.uk/BayesTraitsV3.0.2/BayesTraitsV3.0.2.html>). We ran four  
501 independent MCMC chains for 510 million iterations with a burn-in of 10 million iterations and  
502 retaining every 1000<sup>th</sup> iteration. Marginal likelihood was calculated using stepping-stones with 1000  
503 power posteriors estimated with 10,000 iterations each. We assessed convergence using Gelman's R  
504 implemented in the coda R package [107] and upon confirming convergence merged the chains for  
505 further analysis. Models were compared with Bayes factors using the marginal likelihoods (i.e.  
506  $BF=2(\log LH_{\text{dependent}} - \log LH_{\text{independent}})$ ). We evaluated the robustness of our results by performing the  
507 analysis with several phylogenies and three different priors (see SI Correlated evolution).

## 508 Convergence in morphospace

509 We conducted a multivariate analysis to investigate whether the convergent evolution of HI is  
510 associated with changes in a variety of reproductive traits (see SI Morphology). We summarised data  
511 on stylet, sperm and antrum morphology (including both quantitative and categorical data) using  
512 principal component analysis. Since regular principal component analysis assumes independence of  
513 observations, an assumption violated by the phylogenetic relationships of species [108], we calculated  
514 phylogenetically corrected principal components (pPCAs), using the phyPCA function in phytools  
515 with the lambda model. Since we combined data with different scales, we used the correlation matrix  
516 for all calculations. When discussing loadings of principal components, we apply an aggressive  
517 threshold of  $\pm 0.5$ , since although this results in erosion of power, it keeps false-positive rate within  
518 expectations [109].

## 519 Hypodermic insemination and sperm length

520 To test the influence of HI on sperm length, we performed phylogenetically corrected ordinary least  
521 squared regression (PGLS) with the *gls* function in the R package *nlme* (version 3.1). We used *gls*  
522 because it allowed us to simultaneously incorporate phylogenetic signal in the residuals and account  
523 for variation in the number of measured specimens by using the sample size of the response as  
524 weights. We determined the best-fitting evolutionary model for the covariance in the residuals by  
525 comparing corrected AIC of PGLS fitted with Brownian motion, lambda or Ornstein-Uhlenbeck  
526 models. We assessed if the assumptions of the PGLS were met by checking the distributions of the  
527 phylogeny-corrected residuals for normality and profiled the likelihood of the parameter of the  
528 correlation structure (i.e. lambda or alpha). Since R-squared values are problematic for PGLS models  
529 [110] we calculated  $R_{\text{pred}}$  [111] to show model fits. As predictors, we used the binary traits included  
530 in the test of correlated evolution since they all are strong indicators of HI. Moreover, we also  
531 included the inferred mating syndrome as a predictor, but coded it as binary (hypodermic and  
532 reciprocal), and excluding the intermediate syndrome due to the low sample size of this group.

## 533 Acknowledgments

534 We thank the numerous people that have helped with field work. Especially, we are grateful for the  
535 help of, in no particular order, Werner Armonies, Benny Glasgow, Mohamed Charni, Edith Zemp,  
536 Bernhard Egger, Peter Ladurner, Gregor Schulte, Floriano Papi, Kazuya Kobayashi, Christopher  
537 Laumer, Wim Willems, Tom Artois, Christian Lott, Miriam Weber, Ana-Maria Leal-Zanchet, Kaja  
538 Wasik, Mariana Adami, Walter Salzburger, Adrian Indermaur, Bernd Egger, Fabrizia Ronco, Heinz  
539 Büscher, Victoria Huwiler, Philipp Kaufmann, Michaela Zwyrer, Stefanie von Fumetti, Joe Ryan,  
540 Mark Q. Martindale, Marta Chiodin, John Evans, Leigh Simmons, Mauro Tognon, Piero Tognon,  
541 Cristiano Tognon, Pragya Singh, Nikolas Vellnow, Christian Felber, Ulf Jondelius, Sarah Atherton,  
542 Tim Janicke, Georgina Rivera-Ingraham, Ben Byrne, Yvonne Gilbert, Rod Watson, Jochen Rink,  
543 Miquel Vila-Fare, Helena Bilandžija, and Sasho Trajanovski. We thank Peter Fields and Lukas  
544 Zimmermann for IT advice. We thank Jürgen Hottinger, Daniel Lüscher and Yasmin Picton for  
545 administrative and technical support. We thank Norbert Vischer for help with writing a ObjectJ  
546 plugin. We thank Yu Zhang and his collaborators for kindly providing specimens of *M. baoanensis*.

## 547 Funding

548 This work was supported by Swiss National Science Foundation (SNSF) research grants  
549 31003A\_162543 and 310030\_184916 to LS.

550 **Competing Interests**

551 All Authors declare that they have no competing interests.

552 **Data availability**

553 All relevant data is included in the supplementary information of this publication.

554 **Author contribution**

555 Jeremias N. Brand: Conceptualisation, Data Curation, Formal Analysis, Investigation, Visualisation,  
556 Writing – Original Draft Preparation, Writing – Review & Editing. Luke J. Harmon: Methodology,  
557 Supervision. Lukas Schärer: Conceptualisation, Investigation, Funding Acquisition, Project  
558 Administration, Resources, Supervision, Writing – Review & Editing

## 559 References

- 560 1. Bateman AJ. Intra-sexual selection in *Drosophila*. *Heredity*. 1948;2:349–68.
- 561 2. Arnold SJ. Bateman’s principles and the measurement of sexual selection in plants and animals.  
562 *Am Nat*. 1994;144:S126–49.
- 563 3. Janicke T, Häderer IK, Lajeunesse MJ, Anthes N. Darwinian sex roles confirmed across the animal  
564 kingdom. *Sci Adv*. 2016;2:e1500983–e1500983.
- 565 4. Parker GA. The sexual cascade and the rise of pre-ejaculatory (Darwinian) sexual selection, sex  
566 roles, and sexual conflict. *Cold Spring Harb Perspect Biol*. 2014;6:a017509–a017509.
- 567 5. Puurtinen M, Ketola T, Kotiaho JS. The Good-Genes and Compatible-Genes Benefits of Mate  
568 Choice. *Am Nat*. 2009;174:741–52.
- 569 6. Arnqvist G, Nilsson T. The evolution of polyandry: Multiple mating and female fitness in insects.  
570 *Anim Behav*. 2000;60:145–64.
- 571 7. Hosken DJ, Stockley P. Benefits of Polyandry: A Life History Perspective. In: *Evolutionary*  
572 *Biology*. R.J. Macintyre and M.T. Clegg. Boston: Springer; 2003. p. 173–94.
- 573 8. Arnqvist G, Rowe L. *Sexual conflict*. Princeton: Princeton University Press; 2005.
- 574 9. Parker GA. Sexual conflict over mating and fertilization: An overview. *Philos Trans R Soc B Biol*  
575 *Sci*. 2006;361:235–59.
- 576 10. Rice WR. Sexually antagonistic male adaptation triggered by experimental arrest of female  
577 evolution. *Nature*. 1996;381:232–4.
- 578 11. Arnqvist G, Rowe L. Antagonistic coevolution between the sexes in a group of insects. *Nature*.  
579 2002;415:787–9.
- 580 12. Charnov EL. Simultaneous hermaphroditism and sexual selection. *Proc Natl Acad Sci U S A*.  
581 1979;76:2480–4.
- 582 13. Birkhead TR, Pizzari T. Evolution of sex: Postcopulatory sexual selection. *Nat Rev Genet*.  
583 2002;3:262–73.
- 584 14. Wedell N, Hosken DJ. The evolution of male and female internal reproductive organs in insects.  
585 In: *The evolution of primary sexual characters in animals*. J.L. Leonard and A. Córdoba-Aguilar.  
586 Oxford: Oxford University Press; 2010. p. 307–31.
- 587 15. Morrow EH, Arnqvist G. Costly traumatic insemination and a female counter-adaptation in bed  
588 bugs. *Proc R Soc B Biol Sci*. 2003;270:2377–81.
- 589 16. Morrow EH, Arnqvist G, Pitnick S. Adaptation versus pleiotropy: why do males harm their mates?  
590 *Behav Ecol*. 2003;14:802–6.
- 591 17. Lange R, Reinhardt K, Michiels NK, Anthes N. Functions, diversity, and evolution of traumatic  
592 mating: function and evolution of traumatic mating. *Biol Rev*. 2013;88:585–601.

- 593 18. Schärer L, Janicke T, Ramm SA. Sexual conflict in hermaphrodites. *Cold Spring Harb Perspect*  
594 *Biol.* 2015;7:a017673.
- 595 19. Reinhardt K, Naylor R, Siva-Jothy MT. Reducing a cost of traumatic insemination: female  
596 bedbugs evolve a unique organ. *Proc R Soc B Biol Sci.* 2003;270:2371–5.
- 597 20. Reinhardt K, Anthes N, Lange R. Copulatory wounding and traumatic insemination. *Cold Spring*  
598 *Harb Perspect Biol.* 2015;7:a017582.
- 599 21. Benoit JB, Jajack AJ, Yoder JA. Multiple traumatic insemination events reduce the ability of bed  
600 bug females to maintain water balance. *J Comp Physiol B.* 2012;182:189–98.
- 601 22. Tataric NJ. Traumatic Insemination and Copulatory Wounding. In: *Reference Module in Life*  
602 *Sciences.* Elsevier; 2018.
- 603 23. Tataric NJ, Cassis G, Siva-Jothy MT. Traumatic insemination in terrestrial arthropods. *Annu*  
604 *Rev Entomol.* 2014;59:245–61.
- 605 24. Kathirithamby J, Hrabar M, Delgado JA, Collantes F, Dötterl S, Windsor D, et al. We do not  
606 select, nor are we choosy: Reproductive biology of Strepsiptera (Insecta). *Biol J Linn Soc.*  
607 2015;116:221–38.
- 608 25. Peinert M, Wipfler B, Jetschke G, Kleinteich T, Gorb SN, Beutel RG, et al. Traumatic  
609 insemination and female counter-adaptation in Strepsiptera (Insecta). *Sci Rep.* 2016;6:25052.
- 610 26. Stutt AD, Siva-Jothy MT. Traumatic insemination and sexual conflict in the bed bug *Cimex*  
611 *lectularius*. *Proc Natl Acad Sci.* 2001;98:5683–7.
- 612 27. Siva-Jothy MT. Trauma, disease and collateral damage: conflict in cimicids. *Philos Trans R Soc*  
613 *B Biol Sci.* 2006;361:269–75.
- 614 28. Michiels NK, Newman LJ. Sex and violence in hermaphrodites. *Nature.* 1998;391:647–647.
- 615 29. Sluys R. Sperm resorption in triclads (Platyhelminthes, Tricladida). *Invertebr Reprod Dev.*  
616 1989;15:89–95.
- 617 30. Koene JM. Tales of two snails: sexual selection and sexual conflict in *Lymnaea stagnalis* and  
618 *Helix aspersa*. *Integr Comp Biol.* 2006;46:419–29.
- 619 31. Koene JM, Montagne-Wajer K, Roelofs D, Ter Maat A. The fate of received sperm in the  
620 reproductive tract of a hermaphroditic snail and its implications for fertilisation. *Evol Ecol.*  
621 2009;23:533–43.
- 622 32. Parker GA. Sperm competition and the evolution of ejaculates: Towards a theory base. In: *Sperm*  
623 *competition and sexual selection.* T.R. Birkhead and A.P. Møller. San Diego: Academic Press; 1998.  
624 p. 3–54.
- 625 33. Řezáč Milan. The spider *Harpactea sadistica*: Co-evolution of traumatic insemination and  
626 complex female genital morphology in spiders. *Proc R Soc B Biol Sci.* 2009;276:2697–701.
- 627 34. Michiels NK. Mating conflicts and sperm competition in simultaneous hermaphrodites. In: *Sperm*  
628 *Competition and Sexual Selection.* T.R. Birkhead and A.P. Møller. San Diego: Academic Press; 1998.  
629 p. 219–54.

- 630 35. Anthes N, Putz A, Michiels NK. Sex role preferences, gender conflict and sperm trading in  
631 simultaneous hermaphrodites: a new framework. *Anim Behav.* 2006;72:1–12.
- 632 36. Anthes N. Mate choice and reproductive conflict in simultaneous hermaphrodites. In: *Animal*  
633 *Behaviour: Evolution and Mechanisms*. P. Kappeler. Berlin, Heidelberg: Springer Berlin Heidelberg;  
634 2010. p. 329–57.
- 635 37. Anthes N, David P, Auld JR, Hoffer JNA, Jarne P, Koene JM, et al. Bateman gradients in  
636 hermaphrodites: An extended approach to quantify sexual selection. *Am Nat.* 2010;176:249–63.
- 637 38. Péliissié B, Jarne P, David P. Sexual selection without sexual dimorphism: Bateman gradients in  
638 a simultaneous hermaphrodite. *Evolution.* 2012;66:66–81.
- 639 39. Michiels NK, Koene JM. Sexual selection favors harmful mating in hermaphrodites more than in  
640 gonochorists. *Integr Comp Biol.* 2006;46:473–80.
- 641 40. Jarne P, Auld JR. Animals mix it up too: The distribution of self-fertilization among  
642 hermaphroditic animals. *Evolution.* 2006;60:1816–24.
- 643 41. Koene JM, Schulenburg H. Shooting darts: Co-evolution and counter-adaptation in  
644 hermaphroditic snails. *BMC Evol Biol.* 2005;5:25.
- 645 42. Koene JM, Pförtner T, Michiels NK. Piercing the partner's skin influences sperm uptake in the  
646 earthworm *Lumbricus terrestris*. *Behav Ecol Sociobiol.* 2005;59:243.
- 647 43. Kamimura Y. Twin intromittent organs of *Drosophila* for traumatic insemination. *Biol Lett.*  
648 2007;3:401–4.
- 649 44. Tataric NJ, Cassis G. Surviving in sympatry: Paragenital divergence and sexual mimicry  
650 between a pair of traumatically inseminating plant bugs. *Am Nat.* 2013;182:542–51.
- 651 45. Schärer L, Littlewood DTJ, Waeschenbach A, Yoshida W, Vizoso DB. Mating behavior and the  
652 evolution of sperm design. *Proc Natl Acad Sci.* 2011;108:1490–5.
- 653 46. Ramm SA, Vizoso DB, Schärer L. Occurrence, costs and heritability of delayed selfing in a free-  
654 living flatworm. *J Evol Biol.* 2012;25:2559–68.
- 655 47. Ramm SA, Schlatter A, Poirier M, Schärer L. Hypodermic self-insemination as a reproductive  
656 assurance strategy. *Proc R Soc B Biol Sci.* 2015;282:20150660.
- 657 48. Winkler L, Ramm SA. Experimental evidence for reduced male allocation under selfing in a  
658 simultaneously hermaphroditic animal. *Biol Lett.* 2018;14:20180570.
- 659 49. Brand JN, Viktorin G, Wiberg RAW, Beisel C, Schärer L. Large-scale phylogenomics of the  
660 genus *Macrostomum* (Platyhelminthes) reveals cryptic diversity and novel sexual traits. *bioRxiv.*  
661 2021;:2021/437366.
- 662 50. Schärer L, Joss G, Sandner P. Mating behaviour of the marine turbellarian *Macrostomum* sp.:  
663 these worms suck. *Mar Biol.* 2004;145:373–80.
- 664 51. Vizoso DB, Rieger G, Schärer L. Goings-on inside a worm: Functional hypotheses derived from  
665 sexual conflict thinking. *Biol J Linn Soc.* 2010;99:370–83.



- 666 52. Schärer L, Brand JN, Singh P, Zadesenets KS, Stelzer C-P, Viktorin G. A phylogenetically  
667 informed search for an alternative *Macrostomum* model species, with notes on taxonomy, mating  
668 behavior, karyology, and genome size. *J Zool Syst Evol Res.* 2020;58:41–65.
- 669 53. Singh P, Ballmer DN, Laubscher M, Schärer L. Successful mating and hybridisation in two  
670 closely related flatworm species despite significant differences in reproductive morphology and  
671 behaviour. *Sci Rep.* 2020;10:12830.
- 672 54. Patlar B, Weber M, Temizyürek T, Ramm SA. Seminal fluid-mediated manipulation of post-  
673 mating behavior in a simultaneous hermaphrodite. *Curr Biol.* 2020;30:143–9.
- 674 55. Weber M, Patlar B, Ramm SA. Effects of two seminal fluid transcripts on post-mating behaviour  
675 in the simultaneously hermaphroditic flatworm *Macrostomum lignano*. *J Evol Biol.* 2020;;jeb.13606.
- 676 56. Leasi F, Sevigny JL, Laflamme EM, Artois T, Curini-Galletti M, de Jesus Navarrete A, et al.  
677 Biodiversity estimates and ecological interpretations of meiofaunal communities are biased by the  
678 taxonomic approach. *Commun Biol.* 2018;1:1–12.
- 679 57. Janssen T, Vizoso DB, Schulte G, Littlewood DTJ, Waeschenbach A, Schärer L. The first multi-  
680 gene phylogeny of the Macrostromorpha sheds light on the evolution of sexual and asexual  
681 reproduction in basal Platyhelminthes. *Mol Phylogenet Evol.* 2015;92:82–107.
- 682 58. Egger B, Ladurner P, Nimeth K, Gschwentner R, Rieger R. The regeneration capacity of the  
683 flatworm *Macrostomum lignano*—on repeated regeneration, rejuvenation, and the minimal size  
684 needed for regeneration. *Dev Genes Evol.* 2006;216:565–77.
- 685 59. Maddison WP, FitzJohn RG. The unsolved challenge to phylogenetic correlation tests for  
686 categorical characters. *Syst Biol.* 2015;64:127–36.
- 687 60. Uyeda JC, Zenil-Ferguson R, Pennell MW. Rethinking phylogenetic comparative methods. *Syst*  
688 *Biol.* 2018;67:1091–109.
- 689 61. Anthes N, Schulenburg H, Michiels NK. Evolutionary links between reproductive morphology,  
690 ecology and mating behavior in opisthobranch gastropods. *Evolution.* 2008;62:900–16.
- 691 62. Beese K, Beier K, Baur B. Coevolution of male and female reproductive traits in a simultaneously  
692 hermaphroditic land snail. *J Evol Biol.* 2006;19:410–8.
- 693 63. Brennan PLR, Prum RO, McCracken KG, Sorenson MD, Wilson RE, Birkhead TR. Coevolution  
694 of Male and Female Genital Morphology in Waterfowl. *PLOS ONE.* 2007;2:e418.
- 695 64. Arnqvist G, Rowe L. Correlated evolution of male and female morphologies in water striders.  
696 *Evol Int J Org Evol.* 2002;56:936–47.
- 697 65. McPeck MA, Shen L, Farid H. The correlated evolution of three-dimensional reproductive  
698 structures between male and female damselflies. *Evolution.* 2009;63:73–83.
- 699 66. Simmons LW, Fitzpatrick JL. Female genitalia can evolve more rapidly and divergently than male  
700 genitalia. *Nat Commun.* 2019;10:1312.
- 701 67. Eberhard W. *Female Control: Sexual Selection by Cryptic Female Choice*. Princeton: Princeton  
702 University Press; 1996.

- 703 68. Arnqvist G, Edvardsson M, Friberg U, Nilsson T. Sexual conflict promotes speciation in insects.  
704 Proc Natl Acad Sci. 2000;97:10460–4.
- 705 69. Ritchie MG. Sexual selection and speciation. Annu Rev Ecol Evol Syst. 2007;38:79–102.
- 706 70. Charnov EL. Sperm competition and sex allocation in simultaneous hermaphrodites. Evol Ecol.  
707 1996;10:457–62.
- 708 71. Schärer L. Tests of sex allocation theory in simultaneously hermaphroditic animals. Evolution.  
709 2009;63:1377–405.
- 710 72. van Velzen E, Schärer L, Pen I. The effect of cryptic female choice on sex allocation in  
711 simultaneous hermaphrodites. Proc R Soc B Biol Sci. 2009;276:3123–31.
- 712 73. Schärer L, Pen I. Sex allocation and investment into pre- and post-copulatory traits in  
713 simultaneous hermaphrodites: The role of polyandry and local sperm competition. Philos Trans R  
714 Soc B Biol Sci. 2013;368:20120052–20120052.
- 715 74. Parker GA. Why are there so many tiny sperm? Sperm competition and the maintenance of two  
716 sexes. J Theor Biol. 1982;;281–94.
- 717 75. Parker GA. Sperm competition games: Sperm size and sperm number under adult control. Proc  
718 R Soc Lond B Biol Sci. 1993;253:245–54.
- 719 76. Parker GA. Selection on non-random fusion of gametes during the evolution of anisogamy. J  
720 Theor Biol. 1978;73:1–28.
- 721 77. Schärer L, Janicke T. Sex allocation and sexual conflict in simultaneously hermaphroditic  
722 animals. Biol Lett. 2009;5:705–8.
- 723 78. Ladurner P, Schärer L, Salvenmoser W, Rieger RM. A new model organism among the lower  
724 Bilateria and the use of digital microscopy in taxonomy of meiobenthic Platyhelminthes:  
725 *Macrostomum lignano*, n. sp. (Rhabditophora, Macrostomorpha). J Zool Syst Evol Res.  
726 2005;43:114–26.
- 727 79. Janicke T, Marie-Orleach L, De Mulder K, Berezikov E, Ladurner P, Vizoso DB, et al. Sex  
728 allocation adjustment to mating group size in a simultaneous hermaphrodite. Evolution.  
729 2013;67:3233–42.
- 730 80. Marie-Orleach L, Janicke T, Vizoso DB, David P, Schärer L. Quantifying episodes of sexual  
731 selection: Insights from a transparent worm with fluorescent sperm. Evolution. 2016;70:314–28.
- 732 81. Miller GT, Pitnick S. Sperm-female coevolution in *Drosophila*. Science. 2002;298:1230–3.
- 733 82. Lüpold S, Manier MK, Berben KS, Smith KJ, Daley BD, Buckley SH, et al. How multivariate  
734 ejaculate traits determine competitive fertilization success in *Drosophila melanogaster*. Curr Biol.  
735 2012;22:1667–72.
- 736 83. Manier MK, Lüpold S, Belote JM, Starmer WT, Berben KS, Ala-Honkola O, et al. Postcopulatory  
737 sexual selection generates speciation phenotypes in *Drosophila*. Curr Biol. 2013;23:1853–62.
- 738 84. Parker GA, Immler S, Pitnick S, Birkhead TR. Sperm competition games: Sperm size (mass) and  
739 number under raffle and displacement, and the evolution of P2. J Theor Biol. 2010;264:1003–23.

- 740 85. Immler S, Pitnick S, Parker GA, Durrant KL, Lüpold S, Calhim S, et al. Resolving variation in  
741 the reproductive tradeoff between sperm size and number. *Proc Natl Acad Sci*. 2011;108:5325–30.
- 742 86. Willems M, Leroux F, Claeys M, Boone M, Mouton S, Artois T, et al. Ontogeny of the complex  
743 sperm in the macrostomid flatworm *Macrostomum lignano* (Macrostomorpha, Rhabditophora). *J*  
744 *Morphol*. 2009;270:162–74.
- 745 87. Jiang D, Zhang J. Fly wing evolution explained by a neutral model with mutational pleiotropy.  
746 *Evolution*. 2020;74:2158–67.
- 747 88. Houle D, Bolstad GH, van der Linde K, Hansen TF. Mutation predicts 40 million years of fly  
748 wing evolution. *Nature*. 2017;548:447–50.
- 749 89. Schärer L, Ladurner P, Seifarth C, Salvenmoser W, Zaubzer J. Tracking sperm of a donor in a  
750 recipient: an immunocytochemical approach. *Anim Biol*. 2007;57:121–36.
- 751 90. Giannakara A, Schärer L, Ramm SA. Sperm competition-induced plasticity in the speed of  
752 spermatogenesis. *BMC Evol Biol*. 2016;16.
- 753 91. Giannakara A, Ramm SA. Self-fertilization, sex allocation and spermatogenesis kinetics in the  
754 hypodermically inseminating flatworm *Macrostomum pusillum*. *J Exp Biol*. 2017;220:1568–77.
- 755 92. Pitnick S, Markow TA, Spicer GS. Delayed male maturity is a cost of producing large sperm in  
756 *Drosophila*. *Proc Natl Acad Sci*. 1995;92:10614–8.
- 757 93. Pitnick S. Investment in testes and the cost of making long sperm in *Drosophila*. *Am Nat*.  
758 1996;148:57–80.
- 759 94. Rohde K, Faubel A. Spermatogenesis of *Macrostomum pusillum* (Platyhelminthes,  
760 Macrostomida). *Invertebr Reprod Dev*. 1997;32:209–15.
- 761 95. Rohde K, Watson N. Ultrastructure of spermatogenesis and sperm of *Macrostomum tuba*. *J*  
762 *Submicrosc Cytol Pathol*. 1991;23:23–32.
- 763 96. Faubel A, Blome D, Cannon LRG. Sandy beach meiofauna of eastern Australia (southern  
764 Queensland and New South Wales). I. Introduction and Macrostomida (Platyhelminthes). *Invertebr*  
765 *Syst*. 1994;8:899–1007.
- 766 97. Birkhead TR, Hosken DJ, Pitnick S. *Sperm Biology*. 2009.
- 767 98. Reinhardt K, Dobler R, Abbott J. An ecology of sperm: Sperm diversification by natural selection.  
768 *Annu Rev Ecol Evol Syst*. 2015;46:435–59.
- 769 99. Hoogstraal H, Usinger RL. Monograph of Cimicidae (Hemiptera-Heteroptera). *J Parasitol*.  
770 1967;53:222.
- 771 100. Wudarski J, Egger B, Ramm SA, Schärer L, Ladurner P, Zadesenets KS, et al. The free-living  
772 flatworm *Macrostomum lignano*. *EvoDevo*. 2020;11:5.
- 773 101. Brand JN, Wiberg RAW, Pjeta R, Bertemes P, Beisel C, Ladurner P, et al. RNA-Seq of three  
774 free-living flatworm species suggests rapid evolution of reproduction-related genes. *BMC Genomics*.  
775 2020;21:462.

- 776 102. Wudarski J, Simanov D, Ustyantsev K, de Mulder K, Grelling M, Grudniewska M, et al.  
777 Efficient transgenesis and annotated genome sequence of the regenerative flatworm model  
778 *Macrostomum lignano*. Nat Commun. 2017;8:2120.
- 779 103. Rueden CT, Schindelin J, Hiner MC, DeZonia BE, Walter AE, Arena ET, et al. ImageJ2: ImageJ  
780 for the next generation of scientific image data. BMC Bioinformatics. 2017;18:529.
- 781 104. Bollback JP. SIMMAP: Stochastic character mapping of discrete traits on phylogenies. BMC  
782 Bioinformatics. 2006;7:88.
- 783 105. Revell LJ. phytools: An R package for phylogenetic comparative biology (and other things):  
784 phytools: R package. Methods Ecol Evol. 2012;3:217–23.
- 785 106. Pagel M. Detecting correlated evolution on phylogenies: a general method for the comparative  
786 analysis of discrete characters. Proc R Soc Lond B. 1994;255:37–45.
- 787 107. Plummer M, Best N, Cowles K, Vines K. CODA: Convergence diagnosis and output analysis  
788 for MCMC. R News. 2006;6:7–11.
- 789 108. Revell LJ. Size-correction and principal components for interspecific comparative studies.  
790 Evolution. 2009;63:3258–68.
- 791 109. Peres-Neto PR, Jackson DA, Somers KM. Giving meaningful interpretation to ordination axes:  
792 assessing loading significance in principal component analysis. Ecology. 2003;84:2347–63.
- 793 110. Ives AR. R<sup>2</sup>s for Correlated Data: Phylogenetic Models, LMMs, and GLMMs. Syst Biol.  
794 2019;68:234–51.
- 795 111. Ives A, Li D. rr2: An R package to calculate R<sup>2</sup>s for regression models. J Open Source Softw.  
796 2018;3:1028.
- 797 112. Wang A-T. Three new species of the genus *Macrostomum* from China (Platyhelminthes,  
798 Macrostomida, Macrostomidae). Acta Zootaxonomica Sin. 2005;30:714–20.
- 799 113. Sun T, Zhang L, Wang A-T, Zhang Y. Three new species of freshwater *Macrostomum*  
800 (Platyhelminthes, Macrostomida) from southern China. Zootaxa. 2015;4012:120–34.
- 801 114. Lin Y, Zhou W, Xiao P, Zheng Y, Lu J, Li J, et al. Two new species of freshwater *Macrostomum*  
802 (Rhabditophora: Macrostomorpha) found in China. Zootaxa. 2017;4329:267.
- 803 115. Lin Y-T, Feng W-T, Xin F, Zhang L, Zhang Y, Wang A-T. Two new species and the molecular  
804 phylogeny of eight species of *Macrostomum* (Platyhelminthes: Macrostomorpha) from southern  
805 China. Zootaxa. 2017;4337:423.
- 806 116. Wang L, Xin F, Fang C-Y, Zhang Y, Wang A-T. Two new brackish-water species of  
807 *Macrostomum* (Platyhelminthes, Macrostomida) from mangrove wetland in southern China. Zootaxa.  
808 2017;4276:107.
- 809 117. Xin F, Zhang S-Y, Shi Y-S, Wang L, Zhang Y, Wang A-T. *Macrostomum shenda* and *M.*  
810 *spiriger*, two new brackish-water species of *Macrostomum* (Platyhelminthes: Macrostomorpha) from  
811 China. Zootaxa. 2019;4603:105.

## 813 Figures

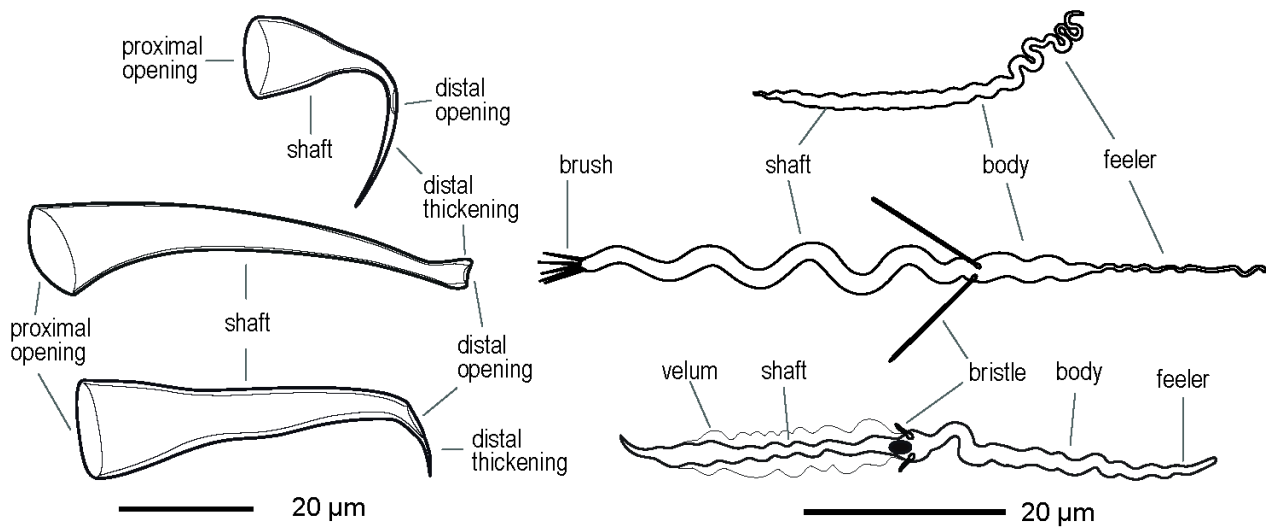

814

815 **Figure 1.** Representative drawings of the morphology of the stylet (male intromittent organ) (left) and the sperm (right)  
816 of three *Macrostomum* species. (Top) *M. sp. 92*, a hypodermically mating species from the hypodermic clade, with a  
817 typical needle-like stylet and a simple sperm morphology. (Middle) The well-studied model *M. lignano* with the typical  
818 morphology for reciprocally mating species, showing a stylet with blunt distal thickenings and a complex sperm with an  
819 anterior feeler, two stiff lateral bristles, and a terminal brush. (Bottom) *M. sp. 9* representing one of the convergent origins  
820 of hypodermic insemination in the reciprocal clade, showing a stylet with a highly asymmetric and sharp distal thickening  
821 and sperm with reduced sperm bristles, no brush, but a thin velum along the shaft. Note that, given the striking diversity  
822 across the *Macrostomum* genus, it is not possible to clearly delimit all the sperm traits originally defined in *M. lignano* in  
823 some of the species.

824

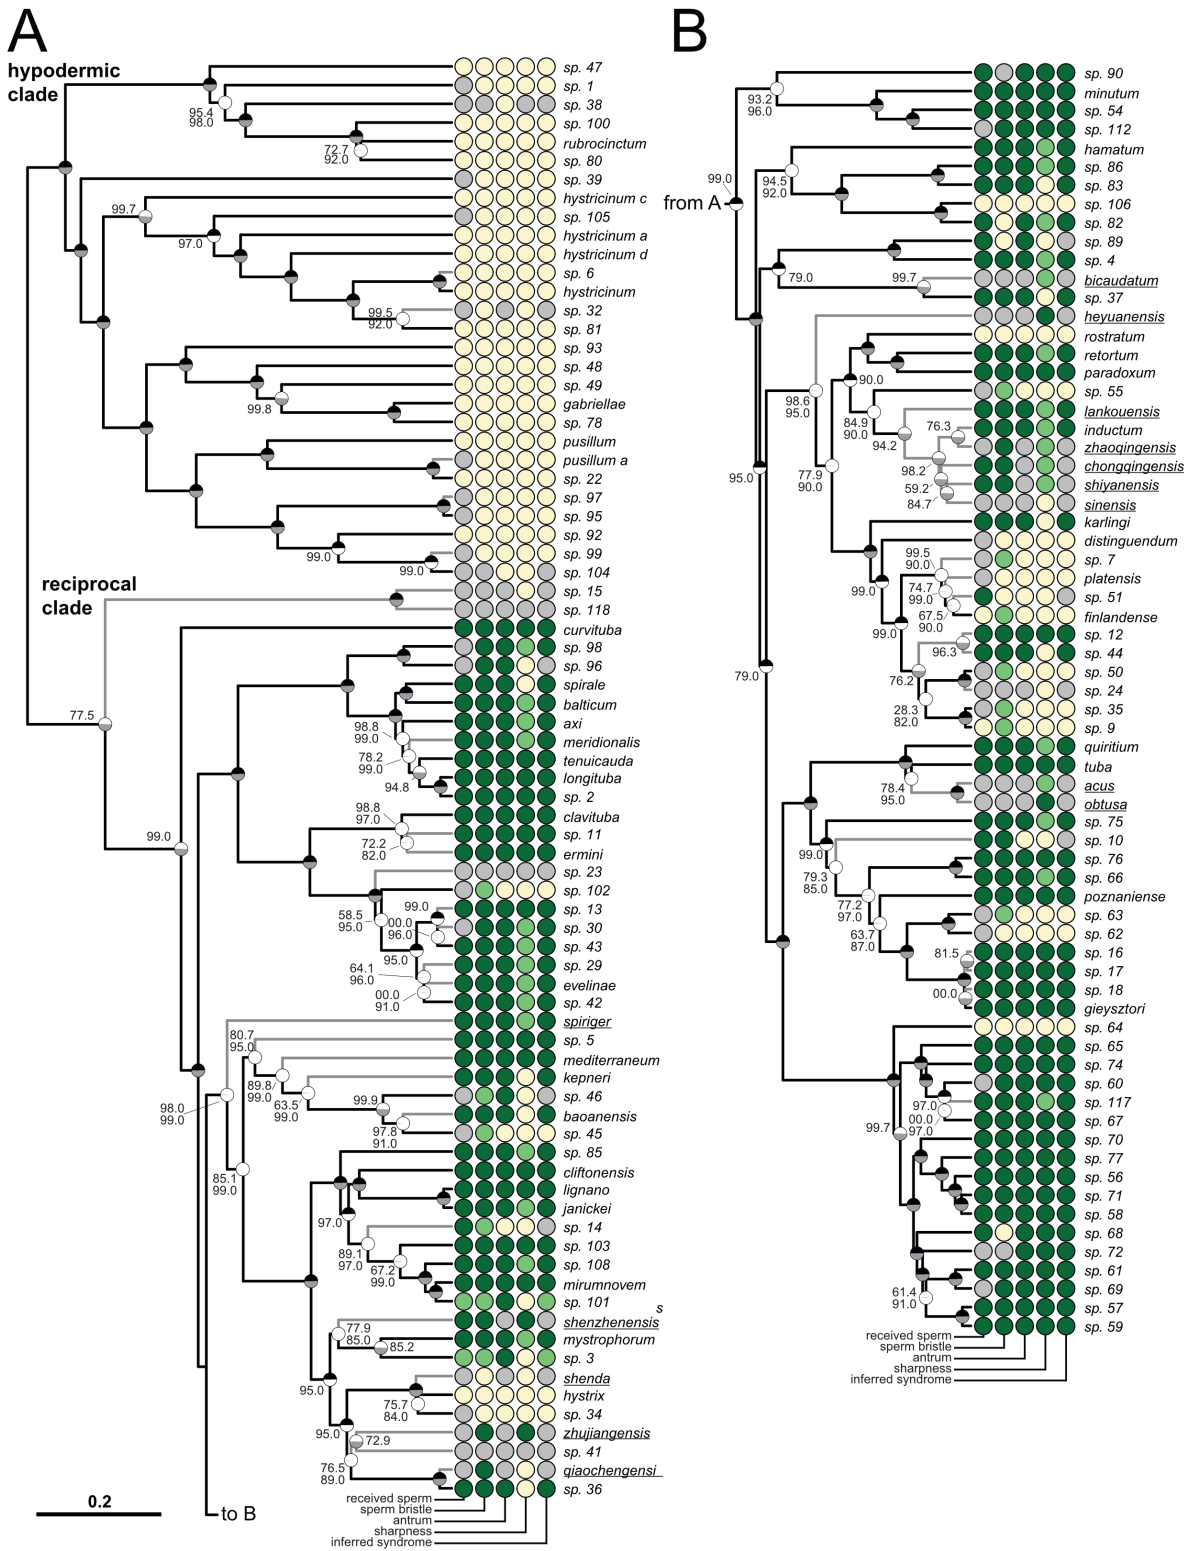

826 **Figure 2.** Phylogeny of the genus *Macrostomum*, showing the states of five reproductive traits. The ultrametric phylogeny  
827 (C-IQ-TREE) includes all 145 species from [49]. Branch supports are ultrafast bootstraps (top, black if 100) and  
828 approximate likelihood ratio tests (bottom, grey if 100). Species without available transcriptomes that were added based  
829 on a *28S rRNA* fragment are indicated with grey branches. Underlined species names indicate that the trait scoring is  
830 based on information from the literature. Two phylogenetically well-separated clades the “hypodermic clade” thought to  
831 exclusively mate through hypodermic insemination (HI) and the “reciprocal clade” primarily mating reciprocally are  
832 labelled in A. Columns indicate the states of five reproductive traits from light to dark (i.e. yellow, light green and dark  
833 green for trinary states; or yellow and dark green for binary states; grey indicates missing data): received sperm location  
834 (hypodermic, both, in antrum), sperm bristle state (absent, reduced, present), antrum state (simple, thickened), sharpness  
835 of stylet (sharp, neutral, blunt), inferred mating syndrome (hypodermic, intermediate, reciprocal). The phylogeny is split  
836 into two parts (A and B) for visualisation. See also Figure SX combining this figure with drawings of stylet and sperm  
837 morphology available from [49].

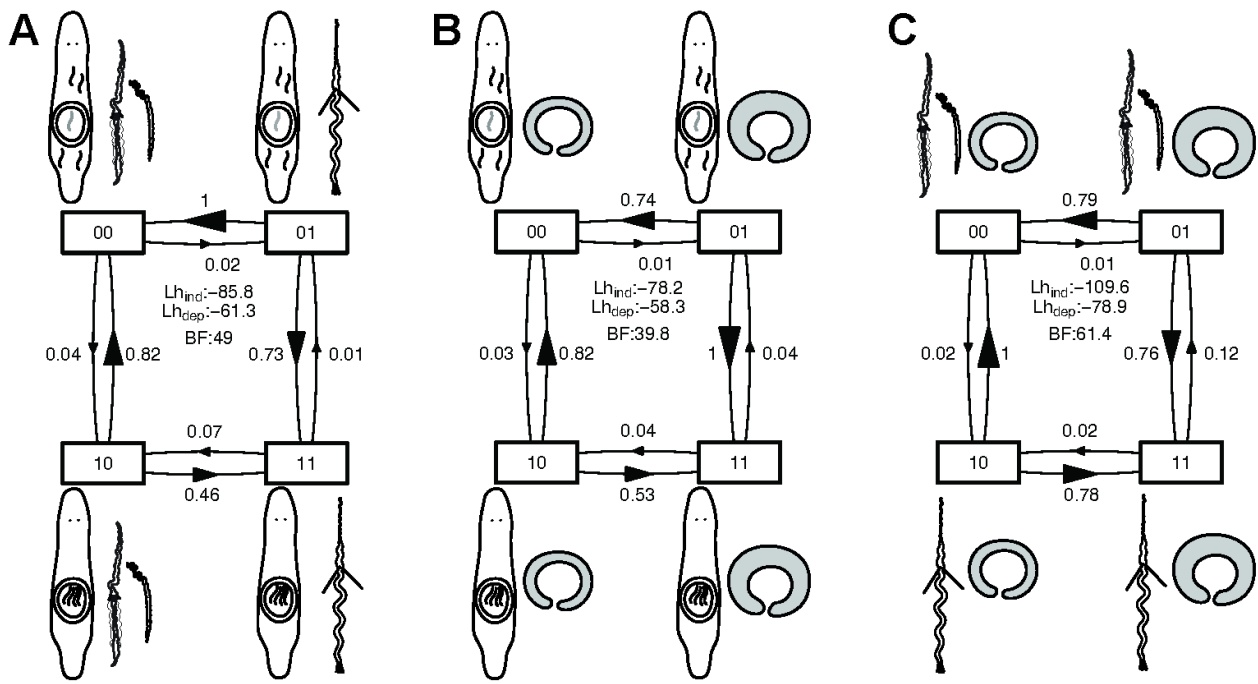

838

839 **Figure 3.** Results of correlated evolution analysis between (A) received sperm location and sperm bristle state, (B)  
 840 received sperm location and antrum state, and (C) sperm bristle state and antrum state. Shown is the transition matrix for  
 841 the dependent model from BayesTraits analysis, which was always preferred over the independent model. Transition rates  
 842 are scaled so that the largest is unity (and arrow sizes are proportional). Also given are the likelihoods of the independent  
 843 (Lh<sub>ind</sub>) and dependent (Lh<sub>dep</sub>) models, and the resulting Bayes factors (BF). An exponential prior and the C-IQ-TREE  
 844 phylogeny was used for the results shown here. See SI Correlated evolution for runs with other priors (uniform and  
 845 reversible-jump hyperprior) and other phylogenies (H-IQ-TREE and H-ExaBayes), which show qualitatively similar  
 846 results.

847



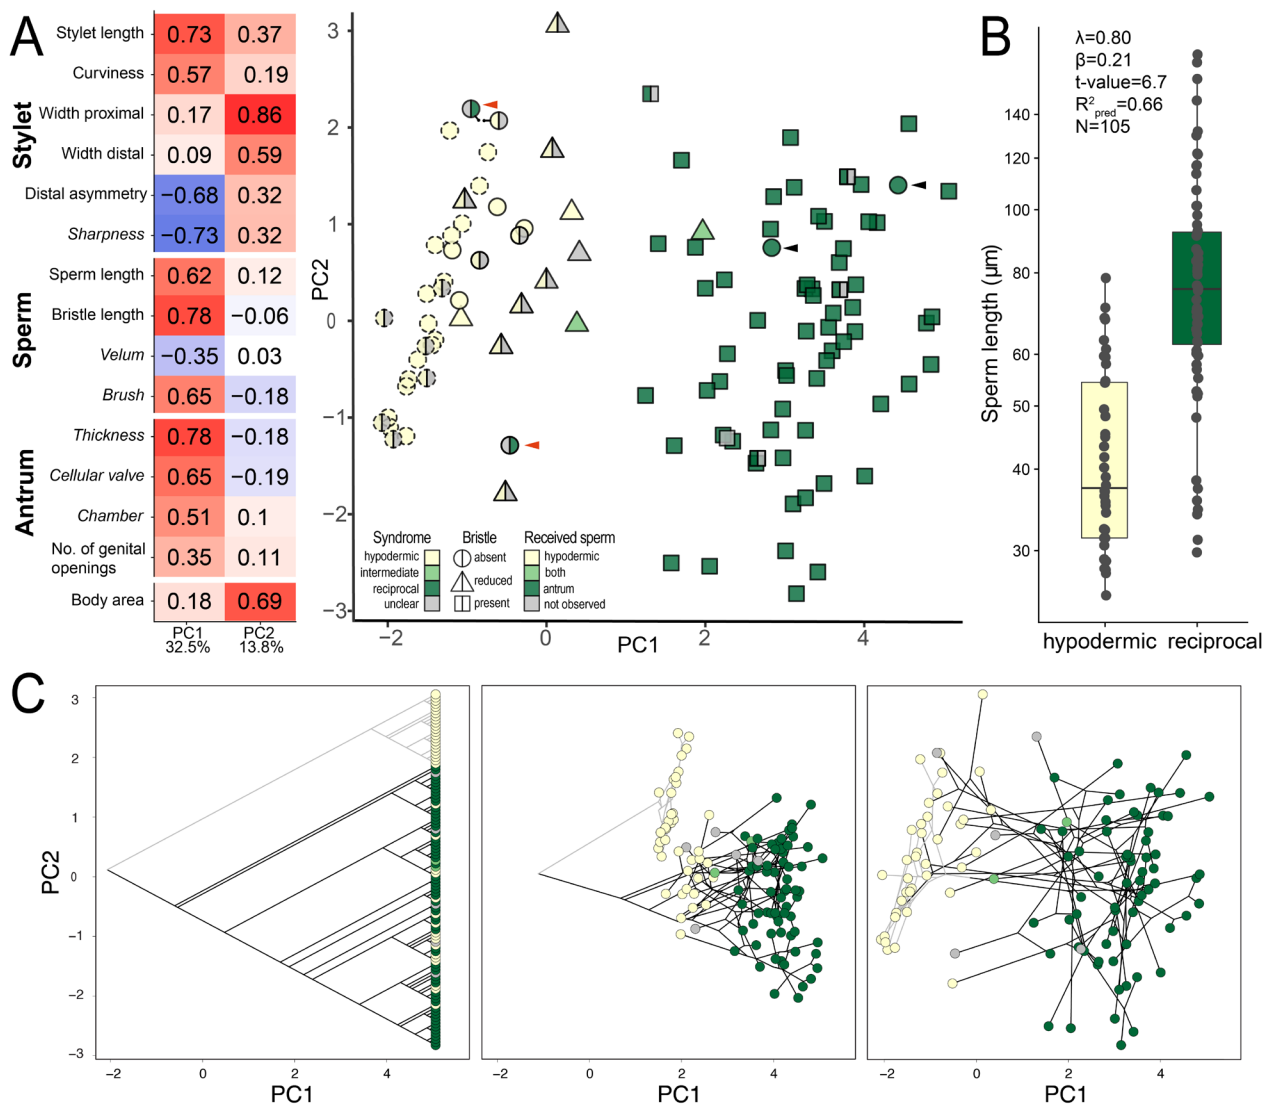

848

849 **Figure 4.** Results of a phylogenetically corrected principal component (pPCA) analysis of the measured quantitative (regular) and categorical (italics) reproductive traits (A,C) and PGLS regression of sperm length dependent on the inferred mating syndrome (B). (A) Left: Loadings of PC1 and PC2, with the percentage of variance explained at the bottom. Right: 2D morphospace defined by PC1 and PC2. As indicated by the legend, the shape represents the sperm bristle state, while the colours represent the inferred mating syndrome (left side) and the received sperm location (right side). All species from the hypodermic clade are outlined with stippled lines. Red arrowheads indicate two species (*Macrostomum* sp. 51 and *M.* sp. 89) that cluster closely with species assigned to the hypodermic mating syndrome, but in which we observed received sperm in the antrum. Black arrowheads indicate two species (*M.* sp. 68 and *M.* sp. 82) assigned to the reciprocal syndrome, which have no discernible sperm bristles (see also Figure S4). (B) Sperm length of species dependent on the inferred mating syndrome. Values are slightly jittered in the x direction, and the y-axis is on a log-scale. Within the panel the main results of PGLS analysis are given, with the slope being significant at  $p < 0.001$ . Results shown here are based on C-IQ-TREE, while detailed results including analyses with other phylogenies (H-IQ-TREE and H-ExaBayes) are in Table S6. (C) The phylogenetic relationships of all species included in the pPCA analysis is represented in the left panel, and the right panel illustrates how species assigned to the hypodermic mating syndrome cluster in morphospace (as also seen in A). Edges of the hypodermic clade are printed in grey to aid in visualisation. The central panel shows an intermediate state in a phytools [105] phylomorphospace animation converting the left to the right panels, see Figure S3.

865

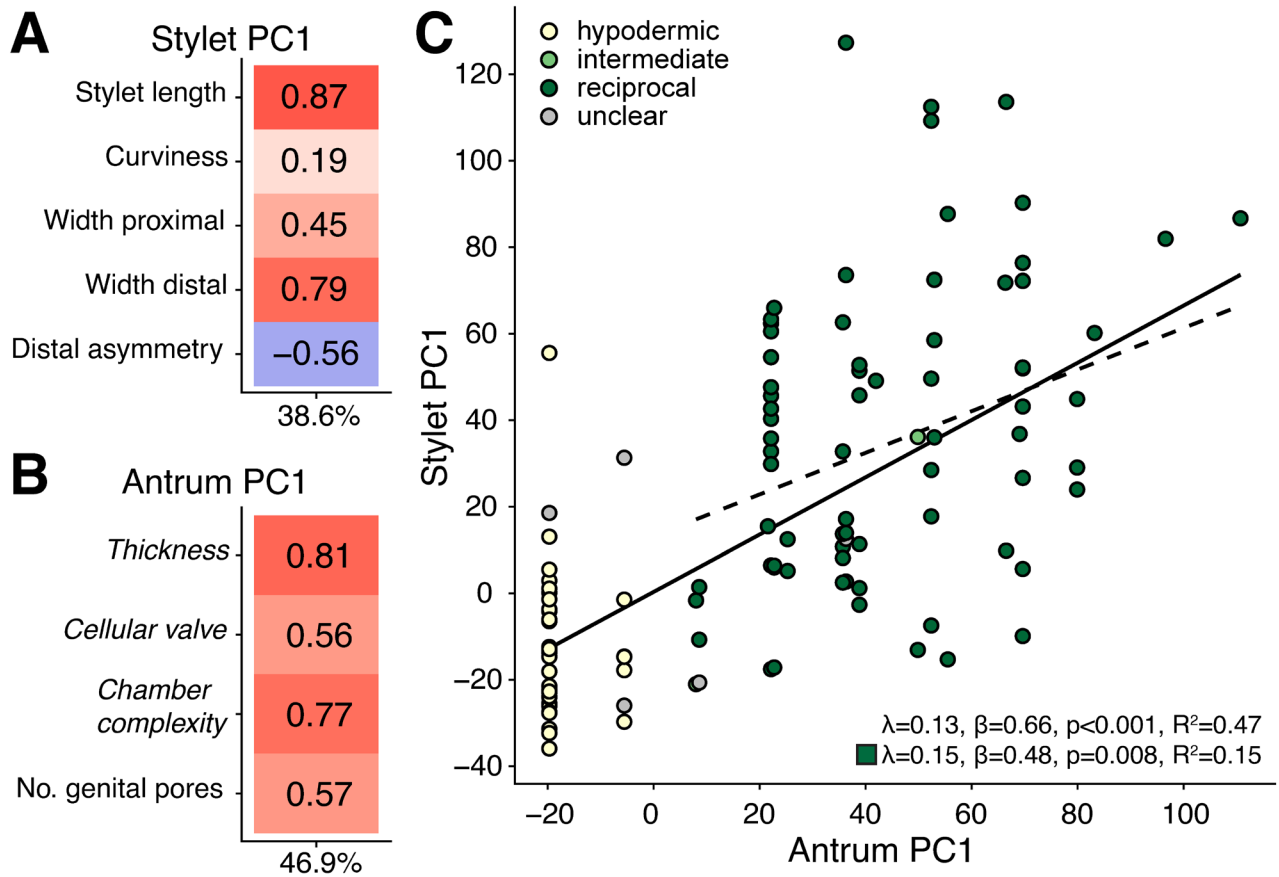

866

867 **Figure 5.** Phylogenetically corrected principal component analyses (pPCA) of stylet and antrum traits, and evidence for  
 868 male-female coevolution. (A and B) Loadings of Stylet PC1 and Antrum PC1, with the percentage of variance explained  
 869 at the bottom, for the stylet traits (A) and antrum (B) traits, respectively (categorical reproductive traits are in italics). (C)  
 870 Results from PGLS regression of Stylet PC1 on Antrum PC1 from (A and B). Regression was performed across all species  
 871 (solid line, upper statistics) and restricted to species of the reciprocal mating syndrome (dashed line, lower statistics). Dot  
 872 colour indicates the inferred mating syndrome that the species are assigned to: hypodermic (yellow), intermediate (light  
 873 green), reciprocal (green), and unclear (grey). Results based on C-IQ-TREE phylogeny, detailed results including analysis  
 874 with other phylogenies (H-IQ-TREE and H-ExaBayes) are in Table S7.

## 875 Tables



**Table 2.** Assignment of the inferred mating syndrome based on different reproductive traits. Species were assigned to an inferred mating syndrome based on the location of received sperm in the body (antrum, in the antrum only; hypodermic, hypodermic only; both, in the antrum and hypodermic; NA, no observation), the sperm bristle state (absent, reduced or present), the antrum state (simple or thickened), and the shape of the distal thickening of the stylet (sharp or blunt). 26 species with either not enough (22 species) or contradictory (four species) information were not assigned to a syndrome. Note, that all 24 species with only hypodermic sperm had the same morphological states, but this was not a condition for their assignment (hence the brackets). Similarly, all 69 species assigned to the reciprocal mating syndrome had a thickened antrum, but this was also not a condition for their assignment. See also Materials and Methods.

| Syndrome     | Received sperm location |            |      |    | Morphology         |             |         | N  |
|--------------|-------------------------|------------|------|----|--------------------|-------------|---------|----|
|              | Antrum                  | Hypodermic | Both | NA | Sperm bristle      | Antrum      | Stylet  |    |
| Hypodermic   |                         | 24         |      |    | (Reduced/absent)   | (Simple)    | (Sharp) | 24 |
| Hypodermic   |                         |            |      | 18 | Reduced/absent     | Simple      | Sharp   | 18 |
| Intermediate |                         |            | 2    |    | Reduced            | Thickened   | Sharp   | 2  |
| Reciprocal   | 61                      |            |      | 6  | Any state          | (Thickened) | Blunt   | 67 |
| Reciprocal   | 8                       |            |      |    | Present            | (Thickened) | Sharp   | 8  |
| Unclear      | 7                       |            |      | 19 | Other combinations |             |         | 26 |

## Supp. Figures

**Figure S1.** Ancestral state reconstructions of reproductive traits using the C-IQ-TREE phylogeny. The trait and type of scoring (binary/trinary) is indicated at the bottom of each panel. Stochastic character mapping is summarised with pie charts representing the proportion of stochastic maps with the respective state. Shown is the reconstruction of the best-fitting ordered model without losses. The average number of transitions is given in Table 1, while the red stars and numbers indicate the lower-bound number of transitions that have likely occurred (i.e. separated by nodes with >95% posterior probability of the ancestral state), while acknowledging that the ancestral state of the genus is often unclear (hence the brackets).

see the file Fig\_S1.pdf

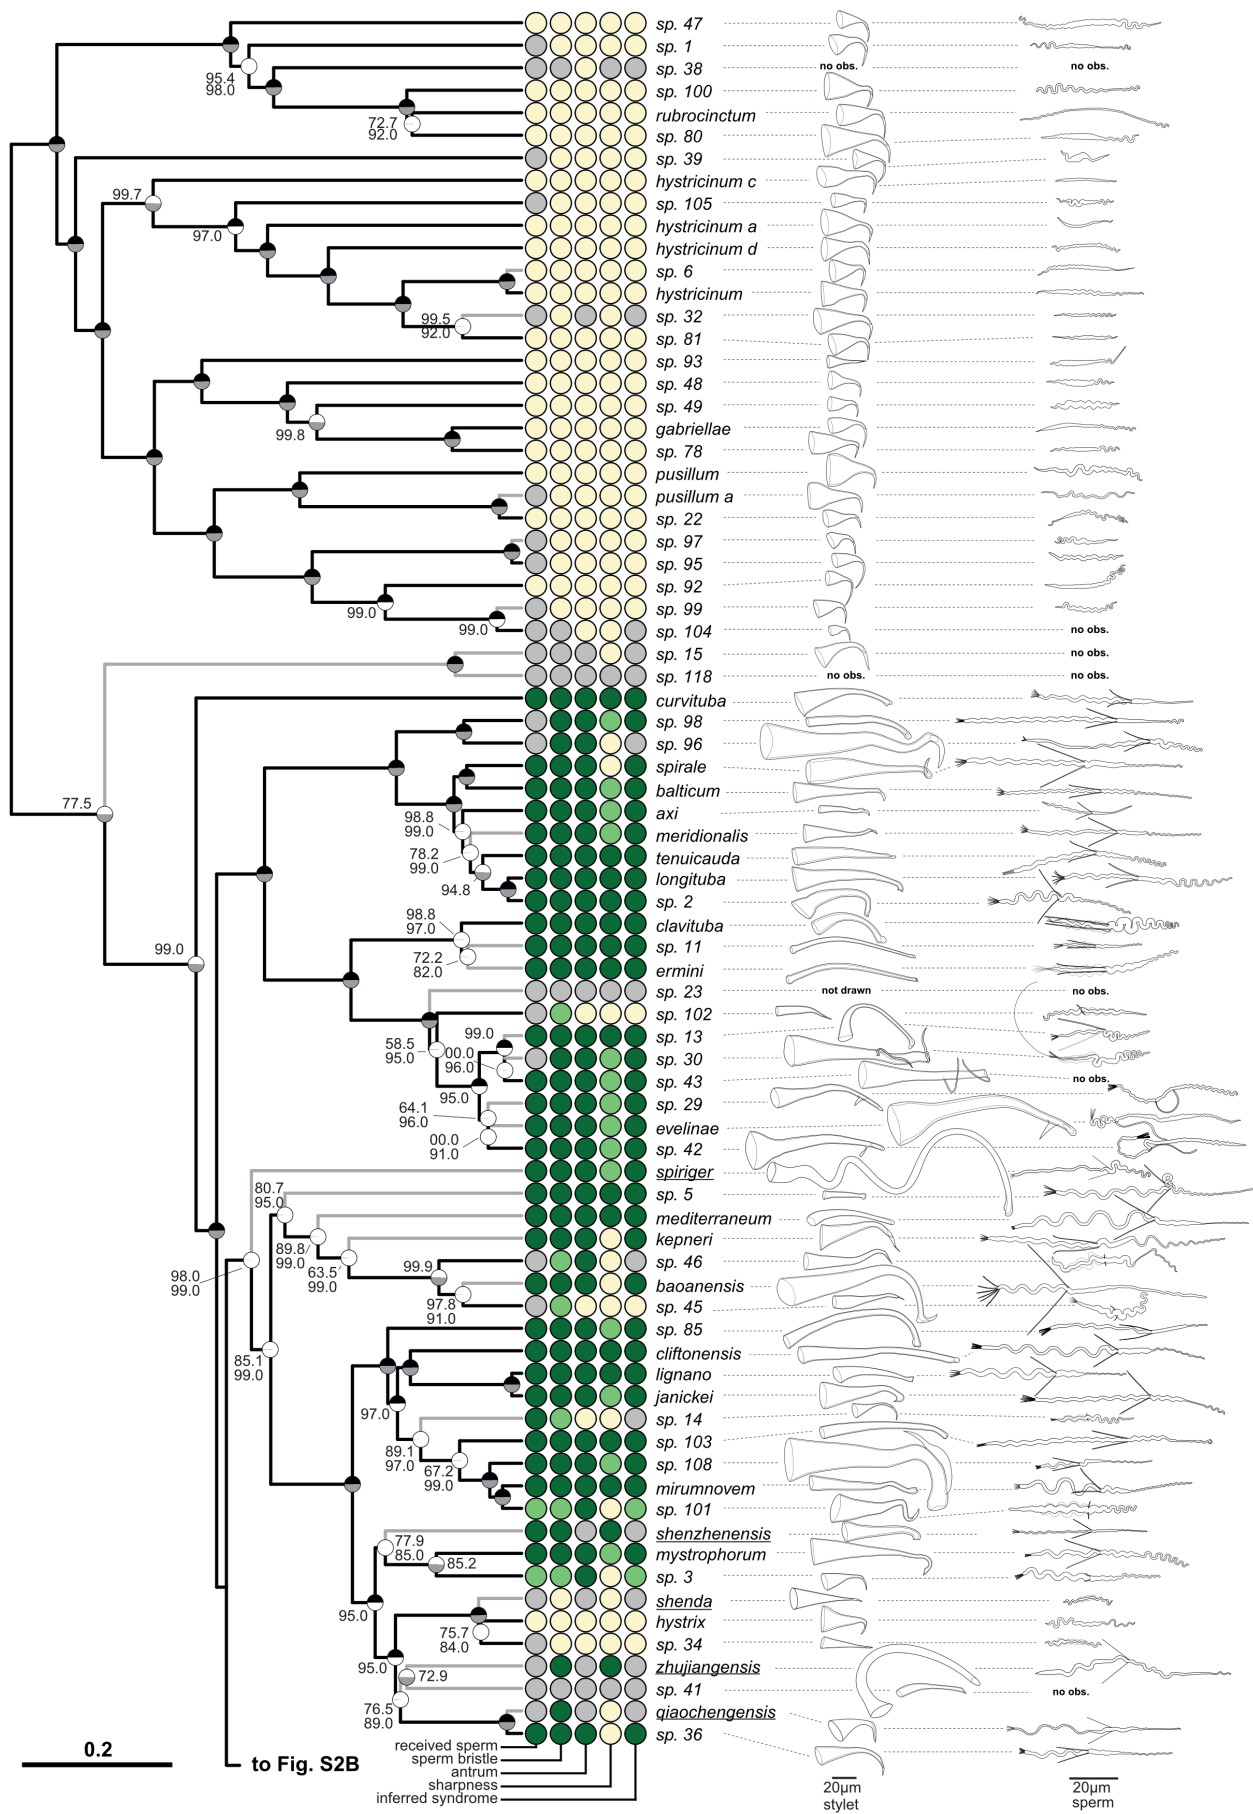

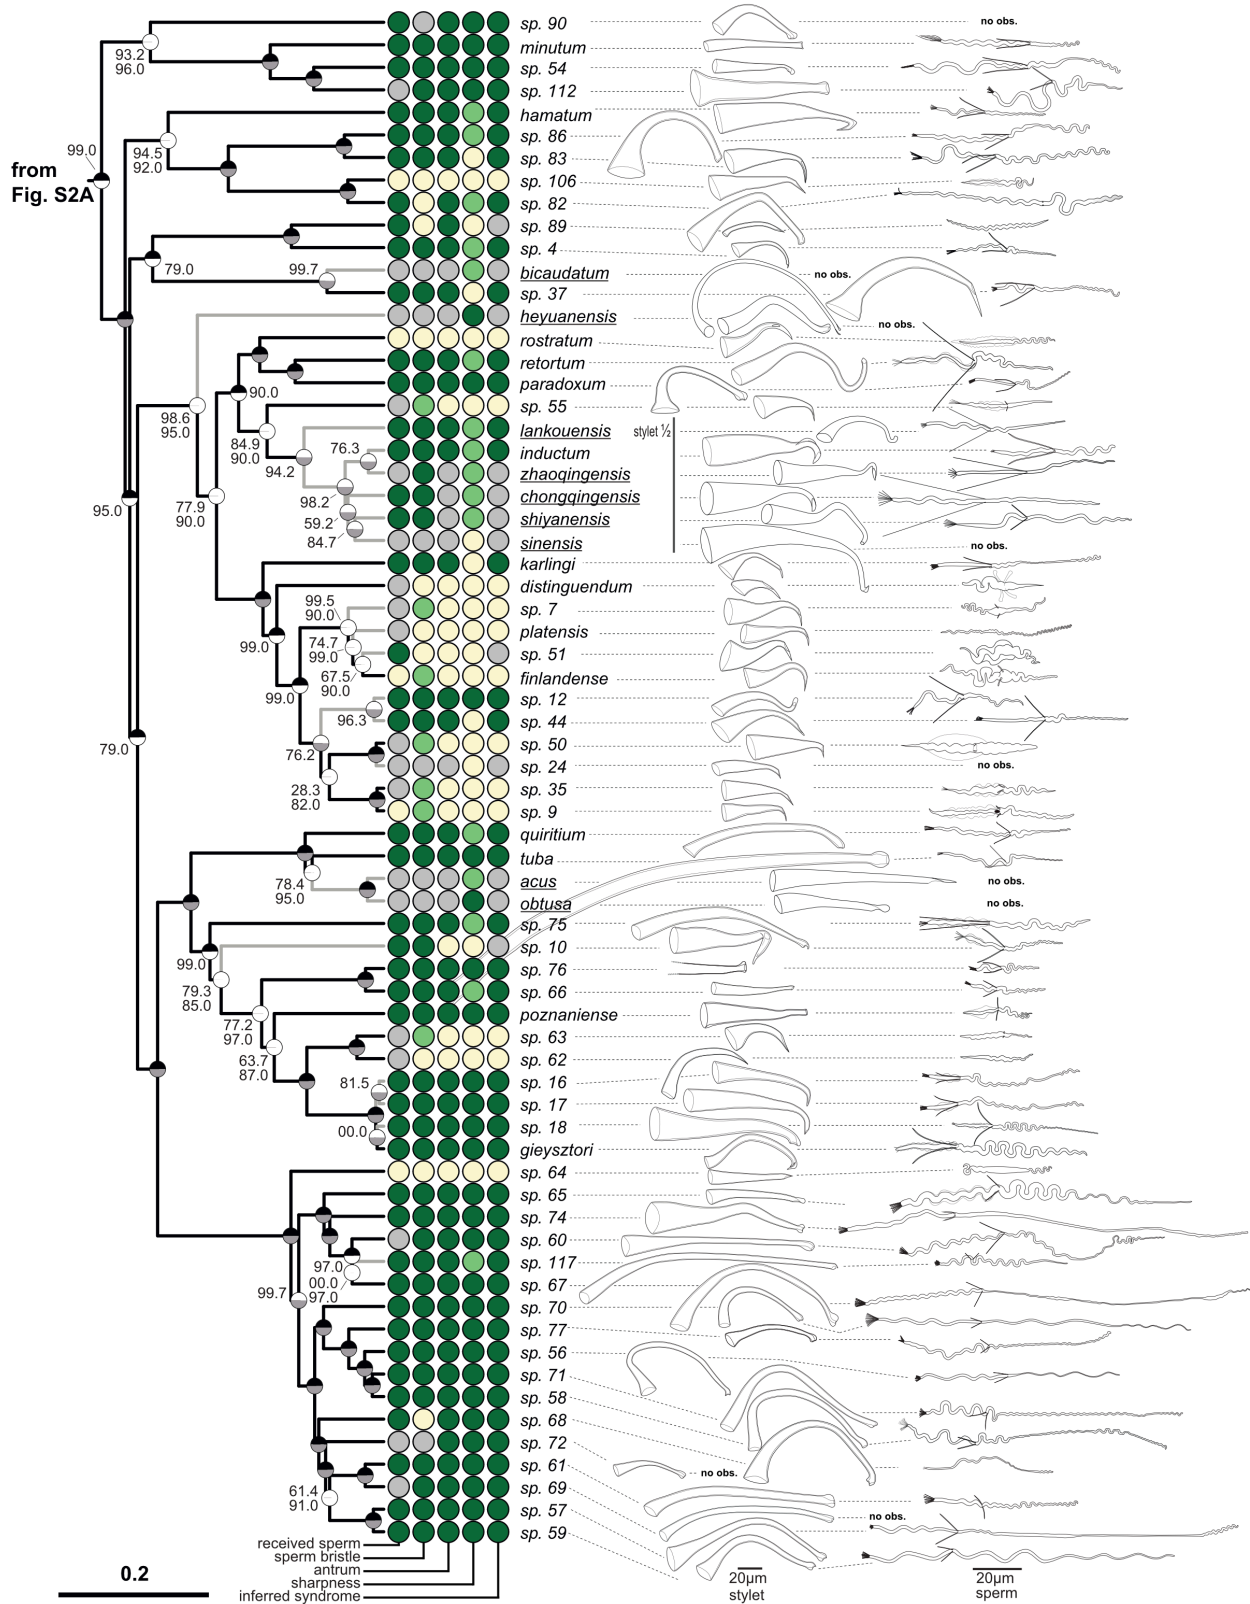



Figure S2. Enhanced version of Figure 2, additionally showing drawings of stylet and sperm morphology available from [49]. The ultrametric phylogeny (C-IQ-TREE) includes all 145 species from [49] (with 77 species depicted in Fig SXA and 68 species in Fig SXB). Branch supports are ultrafast bootstraps (top, black if 100) and approximate likelihood ratio tests (bottom, grey if 100). Species without available transcriptomes that were added based on a 28S *rRNA* fragment are indicated with grey branches. Two phylogenetically well-separated clades the “hypodermic clade” thought to exclusively mate through hypodermic insemination (HI) and the “reciprocal clade” primarily mating reciprocally can be seen in A. Columns indicate the states of five reproductive traits from light to dark (i.e. yellow, light green and dark green for trinary states; or yellow and dark green for binary states; grey indicates missing data): received sperm location (hypodermic, both, in antrum), sperm bristle state (absent, reduced, present), antrum state (simple, thickened), sharpness of stylet (sharp, neutral, blunt), inferred mating syndrome (hypodermic, intermediate, reciprocal). Stylet and sperm morphology are drawn based on our live observations, except for species with underlined names, which were redrawn based on the species description (*M. acus*, *M. obtusa* and *M. sinensis* from Wang 2005; *M. heyuanensis* and *M. bicaudatum* from Sun et al. 2015; *M. chongqingensis* and *M. zhaoqingensis* from Lin et al. 2017a; *M. shiyanensis* and *M. lankouensis* from Lin et al. 2017b; *M. shenzhenensis* and *M. qiaochengensis* from Wang et al. 2017; and *M. spiriger* and *M. shenda* from Xin et al. 2019). The stylet of *M. sp. 15* is not drawn to scale, the stylets of some species are drawn at half size (stylet ½), and the stylet of *M. sp. 23* is not drawn since it was incomplete. Unobserved structures are marked as no observation (no obs.).

**Figure S3.** Animation of the phylomorphospace represented by PC1 and PC2 of the species in the C-IQ-TREE phylogeny. The animation initially shows a cladogram that then gradually transforms into the phylomorphospace, which was calculated using the phylomorphospace function in phytools [105].

see the file Fig\_S3.gif

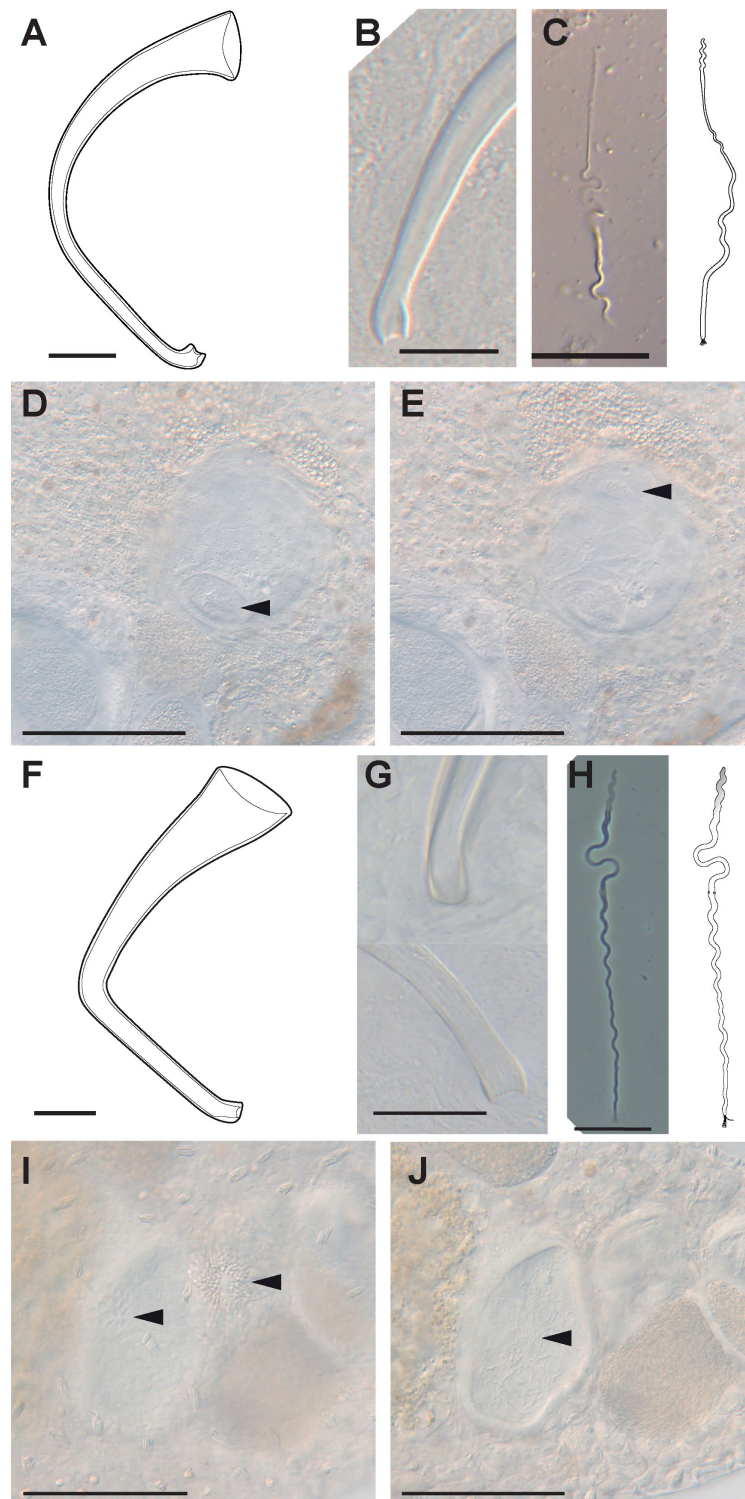

**Figure S4.** Details on the reproductive morphology of *Macrostomum* sp. 68 and *M. sp. 82*. (A-E) *M. sp. 68* (A) Stylet drawing showing the blunt distal thickenings; (B) distal stylet tip in a smash preparation (specimen ID MTP LS 2611). (C) Sperm image (MTP LS 2686) and drawing showing what seems to be a long feeler, but no apparent sperm bristles. (D-E). Details of the antrum (MTP LS 2562) indicating the muscular connection between the female genital opening and the antrum (arrowhead in D) and the anterior second chamber containing at least one received sperm (arrowhead in E). (F-J) *M. sp. 82* (F) Drawing of the stylet showing the slight blunt distal thickenings. (G) Distal stylet tip *in situ* (top, MTP LS 2845) and in a smash preparation (bottom, MTP LS 2846). (H) Sperm image (MTP LS 2877) and drawing indicating the modified anterior part of the sperm (shaded grey) and a less dense area approximately 1/3 along the sperm, which could be a vestigial bristle anchor location (arrowhead). (I-J) Details of the antrum (MTP LS 2848) indicating the anterior genital opening, the bursa pore (I, left arrowhead) next to the posterior genital opening, the gonopore (I, right arrowhead), both connecting into a large chamber containing many received sperm (J, arrowhead). Scale bars represent 100  $\mu$ m in the antrum images and 20  $\mu$ m otherwise.

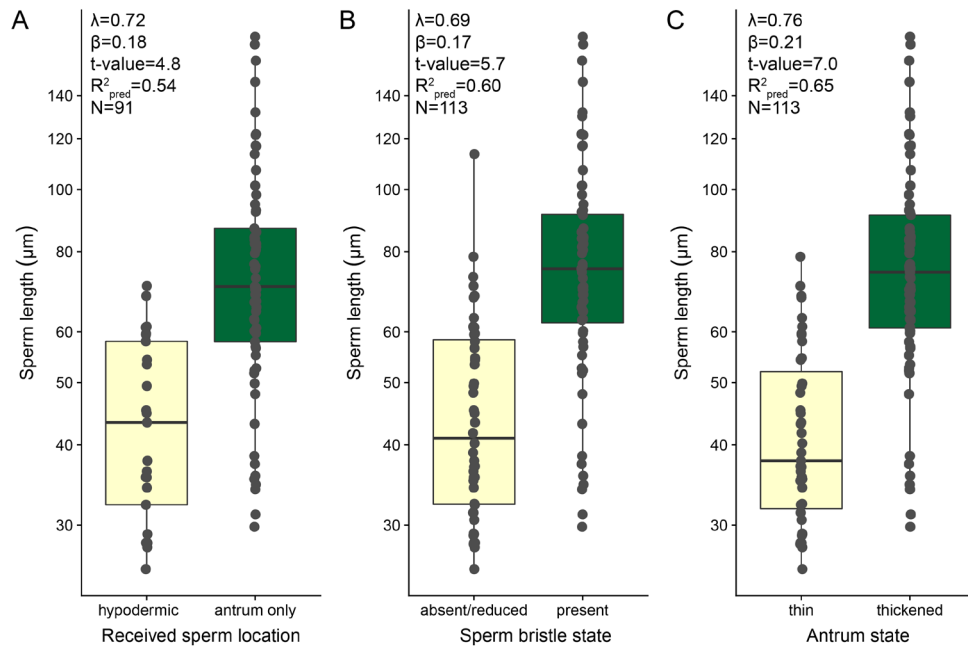

**Figure S5.** Sperm length of species dependent on (A) received sperm location, (B) sperm bristle state, and (C) antrum state. Values are slightly jittered in the x direction, and the y-axis is on a log-scale. Within each panel the main results of a PGLS analysis are given and in all tests the slopes were significant at  $p < 0.001$ . Detailed results including analyses with different phylogenies (H-IQ-TREE and H-ExaBayes) are given in Table S6.

## Supp. Tables

**Table S1.** The number of specimens analysed per *Macrostomum* species for all the included quantitative traits.

see the file Tab\_S1.xlsx

**Table S2.** Details on all specimens included in this study.

see the file Tab\_S2.xlsx

**Table S3.** Mean species values for all morphological variables.

see file Tab\_S3.xlsx

**Table S4.** Ancestral state reconstruction using stochastic character mapping.

see file Tab\_S4.xlsx

**Table S5.** Scores and loadings from the phylogenetically corrected principal component analysis.

see file Tab\_S5.xlsx

**Table S6.** Results of PGLS analysis of states indicating reciprocal copulation versus hypodermic insemination on sperm length. All predictors were binary, with the reference level being the state indicating hypodermic insemination.

see file Tab\_S6.xlsx

**Table S7.** Results from PGLS correlating the first principal components of a phylogenetically corrected principal component analysis (pPCA) analysis including five stylet traits with the first principal component of a pPCA analysis including four antrum traits. Analysis was performed across all species and restricted to the reciprocal mating syndrome. Also given are pPCA loadings and results for all three phylogenies.

see file Tab\_S7.xlsx
